# Supplementary material for: Hydrogen economy driven by offshore wind in regional comprehensive economic partnership members
Source: Royal Society of Chemistry journal article supplement (doi:10.1039/d2ee02332f), 2023-01-01
Supplement: d2ee02332f1.pdf [file d2ee02332f1.pdf]

## Supplementary Information

### Hydrogen economy driven by offshore wind in Regional Comprehensive Economic Partnership members

Wennan Zhuang,<sup>‡</sup> Guangsheng Pan,<sup>‡</sup> Wei Gu,<sup>\*</sup> Suyang Zhou, Qinran Hu, Zhongfan Gu, Zhi Wu,  
Shuai Lu, Haifeng Qiu

<sup>\*</sup> Correspondence to wgu@seu.edu.cn (W.G.).

<sup>‡</sup> These authors contributed equally to this work.

#### **This PDF file includes:**

Supplementary Text  
Figs. S1 to S5  
Tables S1 to S7  
References

## Supplementary Text

### Hydrogen demand prediction model.

In the hydrogen demand prediction, the substitution roles of hydrogen in power generation, heating, industry, and transportation are considered.

1) Hydrogen serves as a direct replacement for power generation. According to the assessment of Hydrogen Council,<sup>1</sup> about 10% of the electricity will be supplied by hydrogen in 2050.

2) The heating sector is further subdivided into building heating (low and medium grade) and industry heating (high grade), with hydrogen substitution ratios of 10% and 25%, respectively.<sup>1</sup>

3) The industry sector can be further subdivided into 7 sub-sectors, the substitution effects of which refer to Fig. S2.<sup>2</sup>

4) The corresponding substitution ratios in the transportation sector, which is further divided into 5 sub-sectors according to the type of transportation, are also different.<sup>1</sup>

The data on energy demand of various sectors are fetched from Asia Pacific Energy Research Centre (APERC).<sup>3,4</sup>

Based on the above basic data, the hydrogen demand in the various sectors can be calculated as follows:

1) Power generation

$$H_i^{\text{POWER}} = \frac{1}{\eta^{\text{POWER}}} \mathcal{G}^{\text{POWER}} \sum_{m \in M_i} ED_{i,m} \quad (\text{S1})$$

where  $\mathcal{G}^{\text{POWER}}$  is the substitution ratio of hydrogen in power generation,  $\eta^{\text{POWER}}$  is the substitution efficiency of hydrogen in power generation, and  $ED_{i,m}$  is the 2050 electricity load demand of the land area radiated by the  $m$ -th harbour of the  $i$ -th member.

2) Heating

$$H_i^{\text{HEAT}} = \frac{1}{\eta^{\text{LHD}}} \mathcal{G}^{\text{LHD}} LHD_i + \frac{1}{\eta^{\text{HHD}}} \mathcal{G}^{\text{HHD}} HHD_i \quad (\text{S2})$$

where  $\mathcal{G}^{\text{LHD}}$  and  $\mathcal{G}^{\text{HHD}}$  are the substitution ratios of hydrogen to the low-grade heating and high-grade heating, respectively,  $\eta^{\text{LHD}}$  and  $\eta^{\text{HHD}}$  are the substitution efficiencies of hydrogen to the low-grade heating and high-grade heating, respectively,  $LHD_i$  is the 2050 low-grade heating demand of the  $i$ -th member, and  $HHD_i$  is the 2050 high-grade heating demand of the  $i$ -th member.

3) Industry

$$H_{i,s,f}^{\text{IND}} = \frac{1}{\eta_{s,f}^{\text{IND}}} \mathcal{G}_{s,f}^{\text{IND}} FD_{i,s,f} \quad (\text{S3})$$

where  $\mathcal{G}_{s,f}^{\text{IND}}$  is the substitution ratio of hydrogen to the  $f$ -th fossil energy of the  $s$ -th sub-sector,  $\eta_{s,f}^{\text{IND}}$  is the substitution efficiency of hydrogen to the  $f$ -th fossil energy of the  $s$ -th sub-sector,  $FD_{i,s,f}$  is the demand of the  $f$ -th fossil energy of the  $s$ -th sub-sector in the  $i$ -th member, and  $f$  refers to coal, oil, and gas.

4) Transportation

$$H_{i,p}^{\text{TRAN}} = \frac{1}{\eta_p^{\text{TRAN}}} \mathcal{G}_p^{\text{TRAN}} TD_{i,p} \quad (\text{S4})$$

where  $\mathcal{G}_p^{\text{TRAN}}$  is the substitution ratio of hydrogen to the  $p$ -th transport,  $\eta_p^{\text{TRAN}}$  is the substitution efficiency of hydrogen to the  $p$ -th transport, and  $TD_{i,p}$  is the energy demand of the  $p$ -th transport in the  $i$ -th member.

The total hydrogen demand of the  $i$ -th member is:

$$H_i^d = H_i^{\text{POWER}} + H_i^{\text{HEAT}} + \sum_{s \in \Theta} \sum_{f \in \{\text{coal}, \text{oil}, \text{gas}\}} H_{i,s,f}^{\text{IND}} + \sum_{n \in \Upsilon} H_{i,n}^{\text{TRAN}} \quad (\text{S5})$$

where  $\Theta$  is the set of sub-sectors in the industry sector, and  $\Upsilon$  is the set of transport in the transportation sector.

Model for transportation using methylcyclohexane (MCH) or ammonia.

The updated Eqs. (S6) to (S14) compared with Eqs. (1), (4), (5), (7), (8), (9), (10), (13), and (14), and one more Eq. (S15) for hydrogen conversion, are presented as follows:

1) Objective function

$$\begin{aligned}
\min_{x \in \{\text{wt-grid, wt-hydro, elz-h, elz-ma, com, ma-IM, ma-EX, sh, cra}\}} & (C_{\text{inv}}^x + C_{\text{om}}^x) + C^{\text{ope}} + C^{\text{loc}} - C^{\text{grid}} \\
= & \sum_{i \in \Xi} \sum_{m \in M_i} \sum_{k \in \Omega_m} \left[ \kappa^{\text{wt}} c_{i,m,k}^{\text{wt}} \left( I_{i,m,k}^{\text{wt-grid}} + \right) + \sigma_{\text{om}}^{\text{wt}} c_{i,m,k}^{\text{wt}} \left( I_{i,m,k}^{\text{wt-hydro}} + \right) \right] + \\
& \sum_{i \in \Xi} \sum_{m \in M_i} \sum_{y \in \{\text{elz-h, elz-ma, com, ma-IM, ma-EX, cra}\}} \left( \kappa^y c_{i,m}^y I_{i,m}^y + \sigma_{\text{om}}^y c_{i,m}^y I_{i,m}^y \right) + \\
& \sum_{i \in \Xi} \sum_{m \in M_i} \sum_{j \in \Gamma_{im}} \sum_{n \in \Phi_{inj}} \left( \kappa^{\text{sh}} N_{i,m,j,n}^{\text{sh}} c_{i,m}^{\text{sh}} + \sigma_{\text{om}}^{\text{sh}} N_{i,m,j,n}^{\text{sh}} c_{i,m}^{\text{sh}} \right) + \\
& \sum_{i \in \Xi} \sum_{m \in M_i} \sum_{t \in T} \left[ c^{\text{we}} \delta^{\text{we}} \left( H_{i,m,t}^{\text{com}} + H_{i,m,t}^{\text{ma}} LHV_{\text{ma}} / LHV_{\text{H}_2} \right) \right] + \\
& \sum_{i \in \Xi} \sum_{m \in M_i} \sum_{j \in \Gamma_{im}} \sum_{n \in \Phi_{inj}} \left( q^{\text{oil}} c^{\text{oil}} R_{i,m,j,n} F_{i,m,j,n} N_{i,m,j,n}^{\text{sh}} \right) + \\
& \sum_{i \in \Xi} \sum_{m \in M_i} LCOH_{i,m}^{\text{loc}} H_{i,m}^{\text{loc}} - \sum_{i \in \Xi} \sum_{m \in M_i} \sum_{t \in T} FIT_{i,m}^{\text{grid}} E_{i,m,t}^{\text{grid}}
\end{aligned} \tag{S6}$$

where elz-ma denotes water electrolyser-MCH or ammonia, ma-IM denotes related storage equipment for MCH or ammonia in import terminals, ma-EX denotes related storage equipment for MCH or ammonia in export terminals, cra denotes the MCH or ammonia cracking equipment,  $I_{i,m}^{\text{elz-ma}}$  denotes the capacity of water electrolyser-MCH or ammonia in the  $m$ -th harbour of the  $i$ -th member,  $I_{i,m}^{\text{cra}}$  denotes the capacity of the MCH or ammonia cracking equipment in the  $m$ -th harbour of the  $i$ -th member,  $H_{i,m,t}^{\text{ma}}$  denotes the output volume of the water electrolyser-MCH or ammonia at the  $t$ -th time in the  $m$ -th harbour of the  $i$ -th member, and  $LHV_{\text{ma}}$  denotes the lower heating value of MCH or ammonia.

2) Constraints

(1) Equipment operation constraint

a. Input power constraint of the water electrolyser-hydrogen, MCH, or ammonia

$$\begin{cases} 0 \leq E_{i,m,t}^{\text{elz-h}} \leq I_{i,m}^{\text{elz-h}} \\ 0 \leq E_{i,m,t}^{\text{elz-ma}} \leq I_{i,m}^{\text{elz-ma}} \end{cases}, \forall i \in \Xi, m \in M_i, t \in T \tag{S7}$$

where  $E_{i,m,t}^{\text{elz-ma}}$  denotes the input power of the water electrolyser-MCH or ammonia at the  $t$ -th time in the  $m$ -th harbour of the  $i$ -th member.

b. Hydrogen constraint of compression and cracking equipment

$$\begin{cases} 0 \leq H_{i,m,t}^{\text{com}} \leq I_{i,m}^{\text{com}} \\ 0 \leq H_{i,m,t}^{\text{cra}} \leq I_{i,m}^{\text{cra}} \end{cases}, \forall i \in \Xi, m \in M_i, t \in T \tag{S8}$$

where  $H_{i,m,t}^{\text{cra}}$  denotes the output volume of hydrogen of the cracking equipment at the  $t$ -th time in the  $m$ -th harbour of the  $i$ -th member.

(2) Hourly power balances

$$\left\{ \begin{array}{l}
E_{i,m,k,t}^{\text{use-grid}} + E_{i,m,k,t}^{\text{cur-grid}} = \rho_{i,m,k,t} I_{i,m,k}^{\text{wt-grid}}, 0 \leq E_{i,m,k,t}^{\text{use-grid}}, 0 \leq E_{i,m,k,t}^{\text{cur-grid}} \\
E_{i,m,t}^{\text{grid}} = \sum_{k \in \Omega_m} E_{i,m,k,t}^{\text{use-grid}} \\
E_{i,m,k,t}^{\text{use-hydro}} + E_{i,m,k,t}^{\text{cur-hydro}} = \rho_{i,m,k,t} I_{i,m,k}^{\text{wt-hydro}}, 0 \leq E_{i,m,k,t}^{\text{use-hydro}}, 0 \leq E_{i,m,k,t}^{\text{cur-hydro}} \\
E_{i,m,t}^{\text{elz-h}} + \lambda^{\text{com}} \eta^{\text{com}} H_{i,m,t}^{\text{com}} + E_{i,m,t}^{\text{elz-ma}} + \lambda^{\text{cra}} H_{i,m,t}^{\text{cra}} = \sum_{k \in \Omega_m} (E_{i,m,k,t}^{\text{use-hydro}} + E_{i,m,k,t}^{\text{cur-grid-hydro}}), \forall i \in \Xi, m \in M_i, t \in T \quad (\text{S9}) \\
0 \leq E_{i,m,k,t}^{\text{cur-grid-hydro}} \leq E_{i,m,k,t}^{\text{cur-grid}} \\
SNSP = \frac{E_{i,m,t}^{\text{grid}}}{\beta_{i,m} E_{i,m,t}^{\text{elec}}} \\
0 \leq SNSP \leq SNSP^{\text{max}}
\end{array} \right.$$

where  $\lambda^{\text{cra}}$  denotes the electricity of the cracking equipment required to generate 1 kg hydrogen.

(3) Related storage equipment constraints of import and export harbour, including storage constraint, charging and discharging balance constraint, and imported and exported MCH or ammonia balance. The specific charging and discharging mechanism is presented in Fig. S1b.

a. Related storage constraint of import and export harbour

$$\left\{ \begin{array}{l}
0 \leq S_{i,m,t}^{\text{ma-IM/EX}} \leq I_{i,m}^{\text{ma-IM/EX}}, S_{i,m,0}^{\text{ma-IM/EX}} = S_{i,m,8760}^{\text{ma-IM/EX}} \\
S_{i,m,t+1}^{\text{ma-IM/EX}} = (1 - \alpha^{\text{ma}}) S_{i,m,t}^{\text{ma-IM/EX}} + H_{i,m,t}^{\text{ma-IM/EX,cha}} - H_{i,m,t}^{\text{ma-IM/EX,dis}}, \forall i \in \Xi, m \in M_i, t \in T \quad (\text{S10}) \\
0 \leq H_{i,m,t}^{\text{ma-IM/EX,cha}} \leq I_{i,m}^{\text{ma-IM/EX}}, 0 \leq H_{i,m,t}^{\text{ma-IM/EX,dis}} \leq I_{i,m}^{\text{ma-IM/EX}}
\end{array} \right.$$

b. Charging and discharging balance constraint

For imported storage:

$$H_{i,m,t}^{\text{ma-IM,cha}} = H_{i,m,t}^{\text{IM}}, H_{i,m,t}^{\text{ma-IM,dis}} = H_{i,m,t}^{\text{ma-loc,IM}}, \forall i \in \Xi, m \in M_i, t \in T \quad (\text{S11})$$

For exported storage:

$$\left\{ \begin{array}{l}
H_{i,m,t}^{\text{ma-EX,cha}} = H_{i,m,t}^{\text{ma}}, H_{i,m,t}^{\text{ma-EX,dis}} = H_{i,m,t}^{\text{ma-loc,EX}} + H_{i,m,t}^{\text{EX}}, \forall i \in \Xi, m \in M_i, t \in T \quad (\text{S12}) \\
0 \leq H_{i,m,t}^{\text{ma-loc,EX}}, 0 \leq H_{i,m,t}^{\text{EX}}
\end{array} \right.$$

(4) Hydrogen balances of harbours

$$H_{i,m}^{\text{d}} = \eta^{\text{com}} \sum_{t \in T} H_{i,m,t}^{\text{com}} + \sum_{t \in T} H_{i,m,t}^{\text{cra}} + H_{i,m}^{\text{loc}}, \forall i \in \Xi, m \in M_i \quad (\text{S13})$$

(5) Energy balances of water electrolyser-hydrogen, MCH, or ammonia in harbours

$$\left\{ \begin{array}{l}
H_{i,m,t}^{\text{com}} = \frac{\eta^{\text{elz-h}} E_{i,m,t}^{\text{elz-h}}}{LHV_{\text{H}_2}}, \forall i \in \Xi, m \in M_i, t \in T \quad (\text{S14}) \\
H_{i,m,t}^{\text{ma}} = \frac{\eta^{\text{elz-ma}} E_{i,m,t}^{\text{elz-ma}}}{LHV_{\text{ma}}}
\end{array} \right.$$

where  $\eta^{\text{elz-ma}}$  denotes the efficiency of water electrolyser-MCH or ammonia.

(6) Hydrogen conversion

$$H_{i,m,t}^{\text{cra}} LHV_{\text{H}_2} = (H_{i,m,t}^{\text{ma-loc,IM}} + H_{i,m,t}^{\text{ma-loc,EX}}) LHV_{\text{ma}} \eta^{\text{cra}}, \forall i \in \Xi, m \in M_i, t \in T \quad (\text{S15})$$

where  $\eta^{\text{cra}}$  denotes the efficiency of the cracking equipment.

Cost calculation 1 for Sections 3.1 to 3.4.

1) Levelized cost of hydrogen before optimisation (Sections 3.1 to 3.2)

The hydrogen production cost of each grid cell is affected by the offshore wind power generation cost, water electrolyser cost, and water charge. Taking an 8 MW wind turbine (MHI Vestas Offshore Wind's V164-8.0 MW turbine) as an example, all of the electricity produced is converted into hydrogen. The specific calculation of the levelized cost of hydrogen (LCOH) is as follows:

$$LCOE_{i,m,k} = \frac{\kappa^{\text{wt}} c_{i,m,k}^{\text{wt}} I_0^{\text{wt}} + \sigma_{\text{om}}^{\text{wt}} c_{i,m,k}^{\text{wt}} I_0^{\text{wt}}}{\sum_{t \in T} \rho_{i,m,k,t} I_0^{\text{wt}}} \quad (\text{S16})$$

$$\text{LCOH}_{i,m,k} = \frac{\kappa^{\text{elz-h}} c_{i,m}^{\text{elz-h}} I_0^{\text{elz-h}} + \sigma_{\text{om}}^{\text{elz-h}} c_{i,m}^{\text{elz-h}} I_0^{\text{elz-h}} + \text{LCOE}_{i,m,k} E_{i,m,k}^{\text{elz-h}} + c^{\text{we}} \delta^{\text{we}} H_{i,m,k}^{\text{elz-h}}}{H_{i,m,k}^{\text{elz-h}}} \quad (\text{S17})$$

where  $\text{LCOE}_{i,m,k}$  and  $\text{LCOH}_{i,m,k}$  are the levelized cost of electricity and hydrogen of the  $k$ -th grid cell of the  $m$ -th harbour in the  $i$ -th member,  $I_0^{\text{wt}}$  is the rated capacity of the offshore wind turbine with 8 MW,  $I_0^{\text{elz-h}}$  is the rated capacity of the water electrolyser-hydrogen, set to 8 MW to ensure the 100% consumption of offshore wind power in any cell at any time, and  $E_{i,m,k}^{\text{elz-h}}$  and  $H_{i,m,k}^{\text{elz-h}}$  are the input electricity and output hydrogen of the water electrolyser-hydrogen of the  $k$ -th grid cell of the  $m$ -th harbour in the  $i$ -th member, which is calculated as follows:

$$H_{i,m,k}^{\text{elz-h}} = \frac{\eta^{\text{elz-h}} E_{i,m,k}^{\text{elz-h}}}{\text{LHV}_{\text{H}_2}} = \frac{\eta^{\text{elz-h}} \sum_{t \in T} \rho_{i,m,k,t} I_0^{\text{wt}}}{\text{LHV}_{\text{H}_2}} \quad (\text{S18})$$

## 2) Levelized cost of landed hydrogen after optimisation (Sections 3.3 to 3.4)

The levelized cost of landed hydrogen ( $\text{LCOH}^{\text{L}}$ ) of the  $n$ -th harbour in the  $j$ -th member with hydrogen imported from the  $m$ -th harbour in the  $i$ -th member includes the shipping-loss considered levelized cost of hydrogen  $\text{LCOH}'_{i,m,j,n}$ , liquefaction  $\text{LCOL}_{i,m,j,n}$ , storage  $\text{LCOS}_{i,m,j,n}$ , and shipping  $\text{LCOSH}_{i,m,j,n}$ , namely:

$$\text{LCOH}^{\text{L}}_{i,m,j,n} = \text{LCOH}'_{i,m,j,n} + \text{LCOL}_{i,m,j,n} + \text{LCOS}_{i,m,j,n} + \text{LCOSH}_{i,m,j,n} \quad (\text{S19})$$

$$\text{LCOH}'_{i,m,j,n} = \frac{\text{LCOH}^*_{i,m}}{(1 - \alpha^{\text{sh}})^{F_{i,m,j,n}}} \quad (\text{S20})$$

$$\text{LCOL}_{i,m,j,n} = \frac{(\kappa^{\text{liq}} c_{i,m}^{\text{liq}} I_{i,m}^{\text{liq}} + \sigma_{\text{om}}^{\text{liq}} c_{i,m}^{\text{liq}} I_{i,m}^{\text{liq}}) + [\text{LCOE}_{i,m}^{\text{hydro,*}} \mu_{i,m} + \text{LCOE}_{i,m}^{\text{grid,*}} (1 - \mu_{i,m})] \cdot \lambda^{\text{liq}} \eta^{\text{liq}} \sum_{t \in T} H_{i,m,t}^{\text{liq}}}{(1 - \alpha^{\text{sh}})^{F_{i,m,j,n}} \sum_{j \in \Gamma_{im}} \sum_{n \in \Phi_{imj}} H_{i,m,j,n}^{\text{EX}}} \quad (\text{S21})$$

$$\text{LCOS}_{i,m,j,n} = \frac{\kappa^{\text{ls-EX}} c_{i,m}^{\text{ls-EX}} I_{i,m}^{\text{ls-EX}} + \sigma_{\text{om}}^{\text{ls-EX}} c_{i,m}^{\text{ls-EX}} I_{i,m}^{\text{ls-EX}}}{(1 - \alpha^{\text{sh}})^{F_{i,m,j,n}} \sum_{j \in \Gamma_{im}} \sum_{n \in \Phi_{imj}} H_{i,m,j,n}^{\text{EX}}} \quad (\text{S22})$$

$$\text{LCOSH}_{i,m,j,n} = \frac{(\kappa^{\text{sh}} N_{i,m,j,n}^{\text{sh}} c_{i,m}^{\text{sh}} + \sigma_{\text{om}}^{\text{sh}} N_{i,m,j,n}^{\text{sh}} c_{i,m}^{\text{sh}}) + (q^{\text{oil}} c^{\text{oil}} R_{i,m,j,n} F_{i,m,j,n} N_{i,m,j,n}^{\text{sh}})}{(1 - \alpha^{\text{sh}})^{F_{i,m,j,n}} H_{i,m,j,n}^{\text{EX}}} \quad (\text{S23})$$

where  $\mu_{i,m}$  denotes the ratio of used offshore wind power from turbines for hydrogen production to the total OWH-used offshore wind power in the developed sea area of the  $m$ -th harbour in the  $i$ -th member based on the optimisation results, and  $\text{LCOE}_{i,m}^{\text{hydro,*}}$ ,  $\text{LCOE}_{i,m}^{\text{grid,*}}$ , and  $\text{LCOH}^*_{i,m}$  are the average levelized cost of electricity for hydrogen production, electricity for grid connection, and hydrogen in the developed sea area of the  $m$ -th harbour in the  $i$ -th member based on the optimisation results, which is:

$$\mu_{i,m} = \frac{\sum_{k \in \Omega_m} \sum_{t \in T} E_{i,m,k,t}^{\text{use-hydro}}}{\sum_{k \in \Omega_m} \sum_{t \in T} (E_{i,m,k,t}^{\text{use-hydro}} + E_{i,m,k,t}^{\text{cur-grid-hydro}})} \quad (\text{S24})$$

$$\text{LCOE}_{i,m}^{\text{hydro,*}} = \frac{\sum_{k \in \Omega_m} (\kappa^{\text{wt}} c_{i,m,k}^{\text{wt}} I_{i,m,k}^{\text{wt-hydro}} + \sigma_{\text{om}}^{\text{wt}} c_{i,m,k}^{\text{wt}} I_{i,m,k}^{\text{wt-hydro}})}{\sum_{k \in \Omega_m} \sum_{t \in T} E_{i,m,k,t}^{\text{use-hydro}}} \quad (\text{S25})$$

$$\text{LCOE}_{i,m}^{\text{grid,*}} = \frac{\sum_{k \in \Omega_m} (\kappa^{\text{wt}} c_{i,m,k}^{\text{wt}} I_{i,m,k}^{\text{wt-grid}} + \sigma_{\text{om}}^{\text{wt}} c_{i,m,k}^{\text{wt}} I_{i,m,k}^{\text{wt-grid}})}{\sum_{k \in \Omega_m} \sum_{t \in T} (E_{i,m,k,t}^{\text{use-grid}} + E_{i,m,k,t}^{\text{cur-grid-hydro}})} \quad (\text{S26})$$

$$\text{LCOH}_{i,m}^* = \frac{\kappa^{\text{elz-h}} c_{i,m}^{\text{elz-h}} I_{i,m}^{\text{elz-h}} + \sigma_{\text{om}}^{\text{elz-h}} c_{i,m}^{\text{elz-h}} I_{i,m}^{\text{elz-h}} + \left[ \text{LCOE}_{i,m}^{\text{hydro,*}} \mu_{i,m} + \text{LCOE}_{i,m}^{\text{grid,*}} (1 - \mu_{i,m}) \right] \sum_{t \in T} E_{i,m,t}^{\text{elz-h}}}{H_{i,m,t}^{\text{com}} + H_{i,m,t}^{\text{liq}}} + c^{\text{we}} \delta^{\text{we}} \quad (\text{S27})$$

The average LCOH<sup>L</sup> of the  $n$ -th harbour in the  $j$ -th member for importing hydrogen is computed as follows:

$$\text{LCOH}_{j,n}^{\text{L}} = \sum_{i \in \Xi} \sum_{m \in M_i} \left( \frac{H_{j,n,i,m}^{\text{IM}}}{\sum_{i \in \Xi} \sum_{m \in M_i} H_{j,n,i,m}^{\text{IM}}} \cdot \text{LCOH}_{i,m,j,n}^{\text{L}} \right) \quad (\text{S28})$$

3) Levelized cost of compressed hydrogen after optimisation (Sections 3.3 to 3.4)

The average levelized cost of compressed hydrogen (LCOC) of the  $n$ -th harbour in the  $j$ -th member is calculated according to:

$$\text{LCOC}_{j,n} = \text{LCOH}_{j,n}^* + \frac{\left( \kappa^{\text{com}} c_{j,n}^{\text{com}} I_{j,n}^{\text{com}} + \sigma_{\text{om}}^{\text{com}} c_{j,n}^{\text{com}} I_{j,n}^{\text{com}} \right) + \left[ \text{LCOE}_{j,n}^{\text{hydro,*}} \mu_{j,n} + \text{LCOE}_{j,n}^{\text{grid,*}} (1 - \mu_{j,n}) \right] \cdot \lambda^{\text{com}} \eta^{\text{com}} \sum_{t \in T} H_{j,n,t}^{\text{com}}}{\eta^{\text{com}} \sum_{t \in T} H_{j,n,t}^{\text{com}}} \quad (\text{S29})$$

4) Levelized cost of used hydrogen after optimisation (Sections 3.3 to 3.4)

The average levelized cost of used hydrogen (LCOH<sup>U</sup>) of the  $n$ -th harbour in the  $j$ -th member is calculated as follows:

$$\text{LCOH}_{j,n}^{\text{U}} = \frac{\text{LCOH}_{j,n}^{\text{loc}} \cdot H_{j,n}^{\text{loc}} + \text{LCOC}_{j,n} \cdot \sum_{t \in T} H_{j,n,t}^{\text{com}} + \sum_{i \in \Xi} \sum_{m \in M_i} \text{LCOH}_{i,m,j,n}^{\text{L}} \cdot H_{j,n,i,m}^{\text{IM}}}{H_{j,n}^{\text{d}}} \quad (\text{S30})$$

Cost calculation 2 for Sections 3.5.

1) Average levelized cost of electricity and hydrogen after optimisation

Assume that:

$$\mu = \frac{\sum_{i \in \Xi} \sum_{m \in M_i} \sum_{k \in \Omega_m} \sum_{t \in T} E_{i,m,k,t}^{\text{use-hydro}}}{\sum_{i \in \Xi} \sum_{m \in M_i} \sum_{k \in \Omega_m} \sum_{t \in T} (E_{i,m,k,t}^{\text{use-hydro}} + E_{i,m,k,t}^{\text{cur-grid-hydro}})} \quad (\text{S31})$$

Then:

$$\left\{ \begin{array}{l} \overline{\text{LCOE}}^{\text{hydro}} = \frac{\sum_{i \in \Xi} \sum_{m \in M_i} \sum_{k \in \Omega_m} (\kappa^{\text{wt}} c_{i,m,k}^{\text{wt}} I_{i,m,k}^{\text{wt-hydro}} + \sigma_{\text{om}}^{\text{wt}} c_{i,m,k}^{\text{wt}} I_{i,m,k}^{\text{wt-hydro}})}{\sum_{i \in \Xi} \sum_{m \in M_i} \sum_{k \in \Omega_m} \sum_{t \in T} E_{i,m,k,t}^{\text{use-hydro}}} \\ \overline{\text{LCOE}}^{\text{grid}} = \frac{\sum_{i \in \Xi} \sum_{m \in M_i} \sum_{k \in \Omega_m} (\kappa^{\text{wt}} c_{i,m,k}^{\text{wt}} I_{i,m,k}^{\text{wt-grid}} + \sigma_{\text{om}}^{\text{wt}} c_{i,m,k}^{\text{wt}} I_{i,m,k}^{\text{wt-grid}})}{\sum_{i \in \Xi} \sum_{m \in M_i} \sum_{k \in \Omega_m} \sum_{t \in T} (E_{i,m,k,t}^{\text{use-grid}} + E_{i,m,k,t}^{\text{cur-grid-hydro}})} \end{array} \right. \quad (\text{S32})$$

$$\overline{\text{LCOH}} = \frac{\left( \overline{\text{LCOE}}^{\text{hydro}} \mu + \overline{\text{LCOE}}^{\text{grid}} (1 - \mu) \right) \sum_{i \in \Xi} \sum_{m \in M_i} \sum_{t \in T} E_{i,m,t}^{\text{elz-h/ma}} + \sum_{i \in \Xi} \sum_{m \in M_i} c_{i,m}^{\text{elz-h/ma}} \left( \kappa^{\text{elz-h/ma}} I_{i,m}^{\text{elz-h/ma}} + \sigma_{\text{om}}^{\text{elz-h/ma}} I_{i,m}^{\text{elz-h/ma}} \right)}{\sum_{i \in \Xi} \sum_{m \in M_i} \sum_{t \in T} (\eta^{\text{elz-h/ma}} E_{i,m,t}^{\text{elz-h/ma}} / \text{LHV}_{\text{H}_2})} + \frac{\sum_{i \in \Xi} \sum_{m \in M_i} \sum_{t \in T} H_{i,m,t}^{\text{EX}}}{\sum_{i \in \Xi} \sum_{m \in M_i} \sum_{t \in T} H_{i,m,t}^{\text{IM}}} + c^{\text{we}} \delta^{\text{we}} \quad (\text{S33})$$

2) Average levelized cost of liquefaction after optimisation

$$\overline{\text{LCOH}} = \frac{\sum_{i \in \Xi} \sum_{m \in M_i} \left[ (\kappa^{\text{liq}} c_{i,m}^{\text{liq}} I_{i,m}^{\text{liq}} + \sigma_{\text{om}}^{\text{liq}} c_{i,m}^{\text{liq}} I_{i,m}^{\text{liq}}) + (\overline{\text{LCOE}}^{\text{hydro}} \mu + \overline{\text{LCOE}}^{\text{grid}} (1 - \mu)) \lambda^{\text{liq}} \eta^{\text{liq}} \sum_{t \in T} H_{i,m,t}^{\text{liq}} \right]}{\sum_{i \in \Xi} \sum_{m \in M_i} \sum_{t \in T} H_{i,m,t}^{\text{IM}}} \quad (\text{S34})$$

3) Average levelized cost of storage after optimisation

$$\overline{\text{LCOS}} = \frac{\sum_{i \in \Xi} \sum_{m \in M_i} \left( \kappa_{i,m}^{\text{ls/ma-EX}} c_{i,m}^{\text{ls/ma-EX}} I_{i,m}^{\text{ls/ma-EX}} + \sigma_{\text{om}}^{\text{ls/ma-EX}} c_{i,m}^{\text{ls/ma-EX}} I_{i,m}^{\text{ls/ma-EX}} \right)}{\sum_{i \in \Xi} \sum_{m \in M_i} \sum_{t \in T} H_{i,m,t}^{\text{IM}}} \quad (\text{S35})$$

4) Average levelized cost of shipping after optimisation

$$\overline{\text{LCOSH}} = \frac{\sum_{i \in \Xi} \sum_{m \in M_i} \sum_{j \in \Gamma_{im}} \sum_{n \in \Phi_{inj}} \left( \kappa_{i,m,j,n}^{\text{sh}} N_{i,m,j,n}^{\text{sh}} c_{i,m}^{\text{sh}} + \sigma_{\text{om}}^{\text{sh}} N_{i,m,j,n}^{\text{sh}} c_{i,m}^{\text{sh}} \right) + \sum_{i \in \Xi} \sum_{m \in M_i} \sum_{j \in \Gamma_{im}} \sum_{n \in \Phi_{inj}} \left( q^{\text{oil}} c^{\text{oil}} R_{i,m,j,n} F_{i,m,j,n} N_{i,m,j,n}^{\text{sh}} \right)}{\sum_{i \in \Xi} \sum_{m \in M_i} \sum_{t \in T} H_{i,m,t}^{\text{IM}}} \quad (\text{S36})$$

5) Average levelized cost of cracking after optimisation

$$\overline{\text{LCOCK}} = \frac{\sum_{i \in \Xi} \sum_{m \in M_i} \left[ \left( \kappa_{i,m}^{\text{cra}} c_{i,m}^{\text{cra}} I_{i,m}^{\text{cra}} + \sigma_{\text{om}}^{\text{cra}} c_{i,m}^{\text{cra}} I_{i,m}^{\text{cra}} \right) + \left( \overline{\text{LCOE}}^{\text{hydro}} \mu + \overline{\text{LCOE}}^{\text{grid}} (1 - \mu) \right) \lambda^{\text{cra}} \sum_{t \in T} H_{i,m,t}^{\text{cra}} \right] LHV_{\text{H}_2}}{\sum_{i \in \Xi} \sum_{m \in M_i} \sum_{t \in T} H_{i,m,t}^{\text{IM}} LHV_{\text{ma}}} \quad (\text{S37})$$

6) Average levelized cost of landed hydrogen after optimisation

$$\overline{\text{LCOH}}^{\text{L}} = \begin{cases} \overline{\text{LCOH}} + \overline{\text{LCOH}}^{\text{L}} \\ \overline{\text{LCOH}} + \overline{\text{LCOH}}^{\text{L}} \end{cases} \quad (\text{S38})$$

#### Model simplification.

To simplify the model, the clustering of 12 typical days (288 hours) in 12 months applying K-means in a year based on the average of 5 years (from 2016 to 2020) are selected as typical scenarios for optimisation calculation.

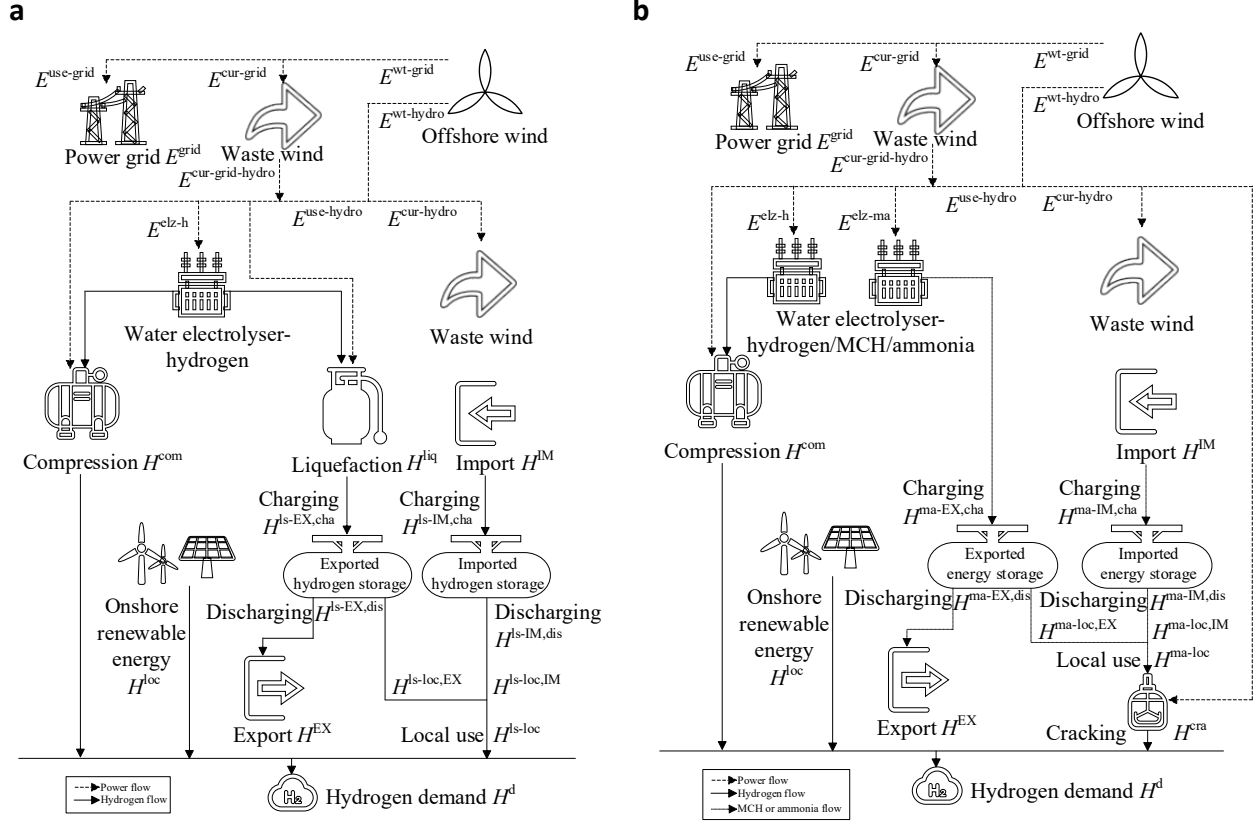

**Fig. S1. Hydrogen-based trade chain model. (a) Transport by liquid hydrogen. (b) Transport by MCH or ammonia.** The solid lines represent hydrogen flow, the dashed lines represent power flow, and the dotted lines represent MCH or ammonia flow.  $E^{wt-grid}$  denotes the total offshore wind power for grid connection, equal to  $\rho^{wt-grid}$ ,  $\rho$  denotes the unit output of the offshore wind turbine,  $\rho^{wt-grid}$  denotes the capacity of offshore wind turbine for grid connection,  $E^{wt-hydro}$  denotes the total offshore wind power for hydrogen production, equal to  $\rho^{wt-hydro}$ ,  $\rho^{wt-hydro}$  denotes the capacity of offshore wind turbine for hydrogen production,  $E^{use-grid}$  denotes the used offshore wind power for grid connection,  $E^{cur-grid}$  denotes the curtailed offshore wind power in grid connection,  $E^{use-hydro}$  denotes the used offshore wind power for hydrogen production,  $E^{cur-hydro}$  denotes the curtailed offshore wind power in hydrogen production,  $E^{cur-grid-hydro}$  denotes the recycled offshore wind power for hydrogen production, which is curtailed in grid connection,  $E^{grid}$  denotes the electricity sold to the power grid,  $E^{elz-h/ma}$  denotes the input power of the water electrolyser-hydrogen, MCH or ammonia,  $H^{liq}$  denotes the input volume of the liquefaction equipment,  $H^{com}$  denotes the input volume of the compression equipment,  $H^{loc}$  denotes the hydrogen production volume from onshore renewable energy,  $H^{IM}$  denotes the imported volume of hydrogen, MCH or ammonia,  $H^{EX}$  denotes the exported volume of hydrogen, MCH or ammonia,  $H^{ls/ma-EX,cha}$  denotes the charging volume of exported storage,  $H^{ls/ma-EX,dis}$  denotes the discharging volume of exported storage,  $H^{ls/ma-loc,EX}$  denotes the discharging volume of hydrogen, MCH or ammonia for local demand in the exported storage,  $H^{ls/ma-IM,cha}$  denotes the charging volume of imported storage,  $H^{ls/ma-IM,dis}$  denotes the discharging volume of imported storage,  $H^{ls/ma-loc,IM}$  denotes the discharging volume of hydrogen, MCH or ammonia for local demand in the imported storage,  $H^{ls/ma-loc}$  denotes the total discharging volume of hydrogen, MCH or ammonia for local



demand,  $H^{cra}$  denotes the output hydrogen of the cracking equipment, and  $H^d$  denotes the local hydrogen demand satisfied by renewables.

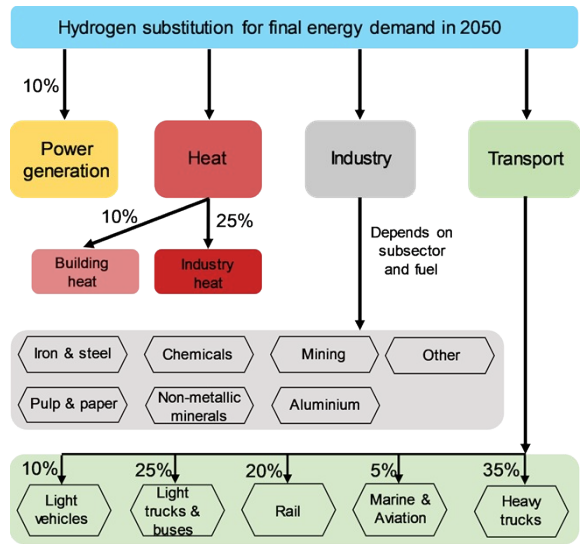

**Fig. S2. Hydrogen demand prediction.** Numbers on the side of the arrows indicate the substitution ratios of hydrogen in various sectors.

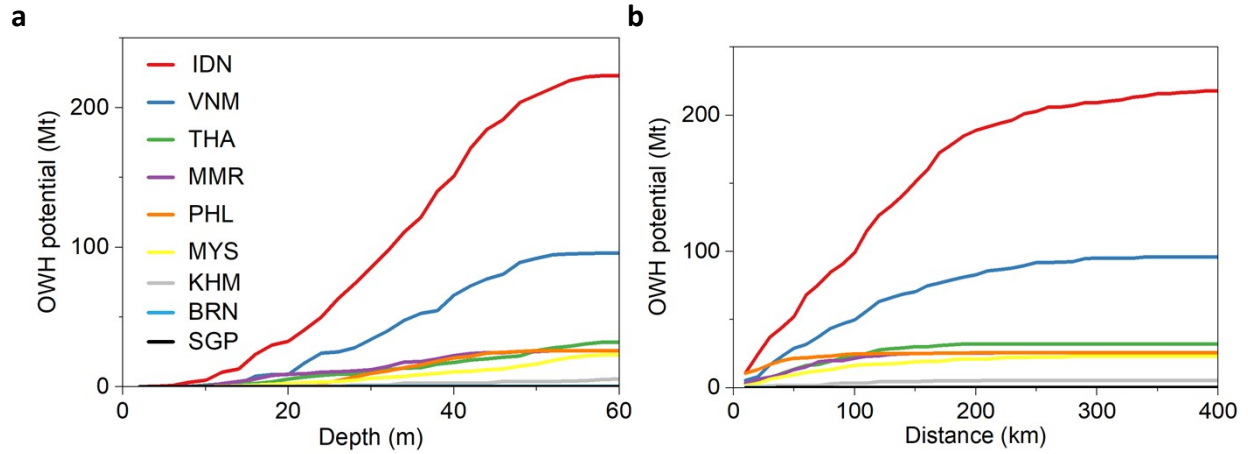

**Fig. S3. Offshore wind-based hydrogen (OWH) production potentials at different depths and offshore distances in nine countries of the Association of Southeast Asian Nations (ASEAN) with sea areas. (a) OWH potential in nine countries of ASEAN at different depths. (b) OWH potential in nine countries of ASEAN at different distances.**

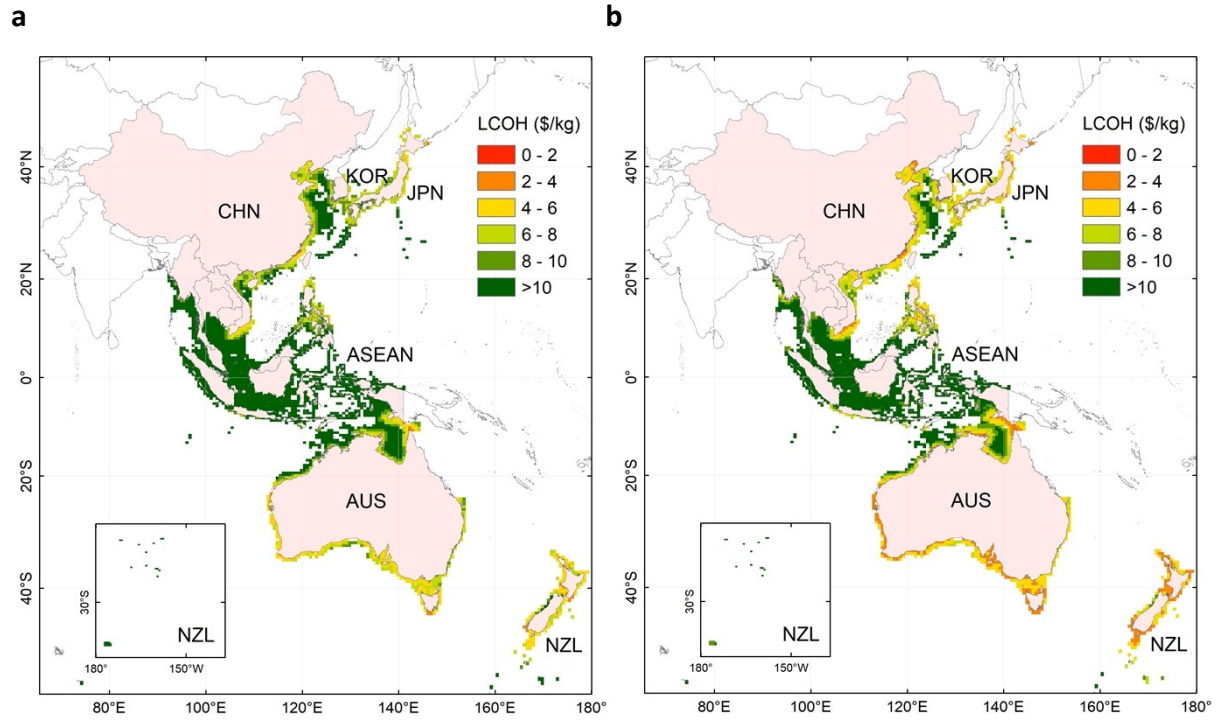

**Fig. S4. Geographical distribution of the levelized cost of hydrogen (LCOH). (a) LCOH in 2030. (b) LCOH in 2040.**

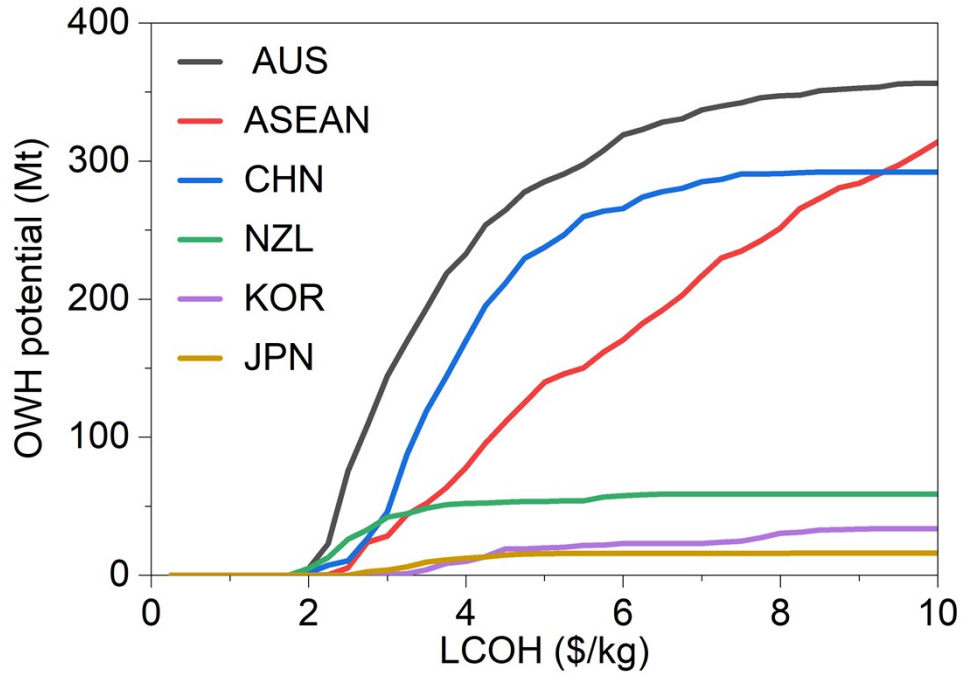

**Fig. S5. Offshore wind-based hydrogen (OWH) potential among RCEP members that can offer a price range of 0-10 \$/kg.**

**Table S1. Location, hydrogen demand, and LCOH from onshore renewables in RCEP from 2030 to 2050.**

| Country | Harbour name | Longitude | Latitude | Hydrogen demand (Mt) |      |       | LCOH from onshore renewables (\$/kg) |      |      |
|---------|--------------|-----------|----------|----------------------|------|-------|--------------------------------------|------|------|
|         |              |           |          | 2030                 | 2040 | 2050  | 2030                                 | 2040 | 2050 |
| AUS     | Gladstone    | 151.2     | -23.8    | 0.27                 | 0.74 | 1.26  | 3                                    | 2.5  | 2    |
| AUS     | Darwin       | 130.8     | -12.5    | 0.02                 | 0.05 | 0.09  | 3                                    | 2.5  | 2    |
| AUS     | Onslow       | 115.1     | -21.7    | 0.22                 | 0.59 | 1.02  | 3                                    | 2.5  | 2    |
| AUS     | Kembla       | 150.9     | -34.5    | 0.85                 | 2.35 | 4.02  | 3                                    | 2.5  | 2    |
| AUS     | Adelaide     | 138.6     | -34.9    | 0.08                 | 0.22 | 0.38  | 3                                    | 2.5  | 2    |
| NZL     | Auckland     | 174.5     | -36.5    | 0.19                 | 0.51 | 0.88  | 4                                    | 3.5  | 3    |
| NZL     | Bluff        | 168.22    | -46.34   | 0.05                 | 0.15 | 0.25  | 4                                    | 3.5  | 3    |
| CHN     | Haikou       | 110       | 20       | 0.14                 | 0.39 | 0.67  | 3.5                                  | 3    | 2.5  |
| CHN     | Beihai       | 109.4     | 21.4     | 0.57                 | 1.56 | 2.67  | 3.5                                  | 3    | 2.5  |
| CHN     | Shenzhen     | 114.5     | 22.6     | 2.83                 | 7.79 | 13.35 | 3.5                                  | 3    | 2.5  |
| CHN     | Xiamen       | 118.1     | 24.5     | 1.12                 | 3.09 | 5.29  | 3.5                                  | 3    | 2.5  |
| CHN     | Wenzhou      | 120.7     | 28       | 1.65                 | 4.54 | 7.79  | 3.5                                  | 3    | 2.5  |
| CHN     | Shanghai     | 122.1     | 30.6     | 0.99                 | 2.72 | 4.66  | 3.5                                  | 3    | 2.5  |
| CHN     | Yancheng     | 120.5     | 33.7     | 2.63                 | 7.22 | 12.38 | 3.5                                  | 3    | 2.5  |
| CHN     | Qingdao      | 120.4     | 36.1     | 1.87                 | 5.14 | 8.81  | 3.5                                  | 3    | 2.5  |
| CHN     | Tianjin      | 117.7     | 39       | 0.36                 | 0.99 | 1.70  | 3.5                                  | 3    | 2.5  |
| CHN     | Qinhuangdao  | 118.8     | 39.1     | 0.93                 | 2.55 | 4.36  | 3.5                                  | 3    | 2.5  |
| CHN     | Dalian       | 121.9     | 39       | 0.64                 | 1.77 | 3.03  | 3.5                                  | 3    | 2.5  |
| KOR     | Gunsan       | 126.7     | 35.9     | 1.24                 | 3.42 | 5.86  | 4                                    | 3.5  | 3    |
| KOR     | Donghae      | 129.1     | 37.5     | 0.92                 | 2.53 | 4.33  | 4                                    | 3.5  | 3    |
| JPN     | Otaru        | 141       | 43.2     | 0.05                 | 0.14 | 0.24  | 5                                    | 4.5  | 4    |
| JPN     | Kushiro      | 144.4     | 42.97    | 0.05                 | 0.14 | 0.24  | 5                                    | 4.5  | 4    |
| JPN     | Kanazawa     | 136.6     | 36.55    | 0.91                 | 2.49 | 4.28  | 5                                    | 4.5  | 4    |
| JPN     | Hitachi      | 140.7     | 36.6     | 0.91                 | 2.49 | 4.28  | 5                                    | 4.5  | 4    |
| JPN     | Tobata       | 133.7     | 34.5     | 0.64                 | 1.75 | 3.00  | 5                                    | 4.5  | 4    |
| JPN     | Kagoshima    | 130.6     | 31.6     | 0.24                 | 0.65 | 1.12  | 5                                    | 4.5  | 4    |
| IDN     | Tangguh      | 133.1     | -2.4     | 0.09                 | 0.24 | 0.41  | 4.5                                  | 4    | 3.5  |
| IDN     | Makassar     | 119.4     | -5.16    | 0.25                 | 0.68 | 1.17  | 4.5                                  | 4    | 3.5  |
| IDN     | Bontang      | 117.5     | 0.1      | 0.32                 | 0.87 | 1.49  | 4.5                                  | 4    | 3.5  |
| IDN     | Jakarta      | 107       | -6.1     | 3.27                 | 9.00 | 15.43 | 4.5                                  | 4    | 3.5  |
| MYS     | Sungai Udang | 102.36    | 2.14     | 1.05                 | 2.89 | 4.95  | 4.5                                  | 4    | 3.5  |
| MYS     | Johor        | 103.8     | 1.5      | 0.39                 | 1.09 | 1.86  | 4.5                                  | 4    | 3.5  |
| PHL     | Batangas     | 120.6     | 13.8     | 0.41                 | 1.13 | 1.94  | 4.5                                  | 4    | 3.5  |
| PHL     | Cebu         | 123.56    | 10.23    | 0.25                 | 0.70 | 1.20  | 4.5                                  | 4    | 3.5  |
| PHL     | Davao        | 125.32    | 7.4      | 0.16                 | 0.45 | 0.76  | 4.5                                  | 4    | 3.5  |
| THA     | Map Ta Phut  | 101.2     | 12.7     | 1.66                 | 4.57 | 7.83  | 4.5                                  | 4    | 3.5  |
| SGP     | Singapore    | 103.7     | 1.3      | 0.13                 | 0.37 | 0.63  | 4.5                                  | 4    | 3.5  |
| BRN     | Muara        | 115       | 5        | 0.02                 | 0.06 | 0.10  | 4.5                                  | 4    | 3.5  |
| KHM     | Phnom-Penh   | 104.8     | 11.5     | 0.16                 | 0.43 | 0.74  | 4.5                                  | 4    | 3.5  |
| MMR     | Yangon       | 96.2      | 16.8     | 0.25                 | 0.69 | 1.19  | 4.5                                  | 4    | 3.5  |
| VNM     | Nha Trang    | 109.15    | 12.2     | 1.80                 | 4.94 | 8.46  | 4.5                                  | 4    | 3.5  |

Note: Demand for 2030 and 2040 and LCOH from onshore renewables are obtained from Hydrogen Council<sup>5</sup> and IEA<sup>6,7</sup>. The supply ratios by renewables are set to be 20%, 50%, and 80% in 2030, 2040, and 2050, respectively.<sup>5</sup> The hydrogen

demand of LAO is merged into that of VNM since that LAO, as a landlocked country, has no offshore wind power resources, but can also satisfy the hydrogen demand using vehicles from the harbour.

**Table S2. Feed-in tariff, electricity demand satisfied by offshore wind plants, and conversion ratio for electricity load used to consume offshore wind power in RCEP from 2030 to 2050.**

| Country | Harbour name | Feed-in tariff (\$/kWh) |       |       | Electricity demand satisfied by offshore wind plants (TWh) |        |        | Conversion ratio for electricity load used to consume offshore wind power |       |       |
|---------|--------------|-------------------------|-------|-------|------------------------------------------------------------|--------|--------|---------------------------------------------------------------------------|-------|-------|
|         |              | 2030                    | 2040  | 2050  | 2030                                                       | 2040   | 2050   | 2030                                                                      | 2040  | 2050  |
| AUS     | Gladstone    | 0.090                   | 0.099 | 0.107 | 1.60                                                       | 4.61   | 12.41  | 0.024                                                                     | 0.054 | 0.122 |
| AUS     | Darwin       | 0.090                   | 0.099 | 0.107 | 0.11                                                       | 0.33   | 0.89   | 0.024                                                                     | 0.054 | 0.122 |
| AUS     | Onslow       | 0.090                   | 0.099 | 0.107 | 1.28                                                       | 3.71   | 9.98   | 0.024                                                                     | 0.054 | 0.122 |
| AUS     | Kembla       | 0.090                   | 0.099 | 0.107 | 5.08                                                       | 14.68  | 39.49  | 0.024                                                                     | 0.054 | 0.122 |
| AUS     | Adelaide     | 0.090                   | 0.099 | 0.107 | 0.48                                                       | 1.37   | 3.70   | 0.024                                                                     | 0.054 | 0.122 |
| NZL     | Auckland     | 0.080                   | 0.088 | 0.096 | 0.71                                                       | 2.13   | 6.10   | 0.024                                                                     | 0.054 | 0.122 |
| NZL     | Bluff        | 0.080                   | 0.088 | 0.096 | 0.20                                                       | 0.62   | 1.76   | 0.024                                                                     | 0.054 | 0.122 |
| CHN     | Haikou       | 0.044                   | 0.048 | 0.053 | 2.05                                                       | 7.29   | 22.74  | 0.019                                                                     | 0.05  | 0.132 |
| CHN     | Beihai       | 0.044                   | 0.048 | 0.053 | 8.21                                                       | 29.21  | 91.06  | 0.019                                                                     | 0.05  | 0.132 |
| CHN     | Shenzhen     | 0.044                   | 0.048 | 0.053 | 41.03                                                      | 146.01 | 455.19 | 0.019                                                                     | 0.05  | 0.132 |
| CHN     | Xiamen       | 0.044                   | 0.048 | 0.053 | 16.27                                                      | 57.88  | 180.43 | 0.019                                                                     | 0.05  | 0.132 |
| CHN     | Wenzhou      | 0.044                   | 0.048 | 0.053 | 23.94                                                      | 85.18  | 265.54 | 0.019                                                                     | 0.05  | 0.132 |
| CHN     | Shanghai     | 0.044                   | 0.048 | 0.053 | 14.34                                                      | 51.02  | 159.05 | 0.019                                                                     | 0.05  | 0.132 |
| CHN     | Yancheng     | 0.044                   | 0.048 | 0.053 | 38.06                                                      | 135.41 | 422.14 | 0.019                                                                     | 0.05  | 0.132 |
| CHN     | Qingdao      | 0.044                   | 0.048 | 0.053 | 27.09                                                      | 96.40  | 300.53 | 0.019                                                                     | 0.05  | 0.132 |
| CHN     | Tianjin      | 0.044                   | 0.048 | 0.053 | 5.22                                                       | 18.57  | 57.88  | 0.019                                                                     | 0.05  | 0.132 |
| CHN     | Qinhuangdao  | 0.044                   | 0.048 | 0.053 | 13.41                                                      | 47.73  | 148.80 | 0.019                                                                     | 0.05  | 0.132 |
| CHN     | Dalian       | 0.044                   | 0.048 | 0.053 | 9.30                                                       | 33.11  | 103.21 | 0.019                                                                     | 0.05  | 0.132 |
| KOR     | Gunsan       | 0.070                   | 0.077 | 0.083 | 22.18                                                      | 47.09  | 95.92  | 0.066                                                                     | 0.13  | 0.256 |
| KOR     | Donghae      | 0.070                   | 0.077 | 0.083 | 16.40                                                      | 34.82  | 70.93  | 0.066                                                                     | 0.13  | 0.256 |
| JPN     | Otaru        | 0.111                   | 0.121 | 0.132 | 0.36                                                       | 1.16   | 3.85   | 0.021                                                                     | 0.067 | 0.214 |
| JPN     | Kushiro      | 0.111                   | 0.121 | 0.132 | 0.36                                                       | 1.16   | 3.85   | 0.021                                                                     | 0.067 | 0.214 |
| JPN     | Kanazawa     | 0.111                   | 0.121 | 0.132 | 6.57                                                       | 20.93  | 69.73  | 0.021                                                                     | 0.067 | 0.214 |
| JPN     | Hitachi      | 0.111                   | 0.121 | 0.132 | 6.57                                                       | 20.93  | 69.73  | 0.021                                                                     | 0.067 | 0.214 |
| JPN     | Tobata       | 0.111                   | 0.121 | 0.132 | 4.61                                                       | 14.67  | 48.88  | 0.021                                                                     | 0.067 | 0.214 |
| JPN     | Kagoshima    | 0.111                   | 0.121 | 0.132 | 1.72                                                       | 5.49   | 18.29  | 0.021                                                                     | 0.067 | 0.214 |
| IDN     | Tangguh      | 0.053                   | 0.058 | 0.063 | 0.60                                                       | 2.46   | 8.43   | 0.024                                                                     | 0.054 | 0.122 |
| IDN     | Makassar     | 0.053                   | 0.058 | 0.063 | 1.69                                                       | 6.95   | 23.83  | 0.024                                                                     | 0.054 | 0.122 |
| IDN     | Bontang      | 0.053                   | 0.058 | 0.063 | 2.14                                                       | 8.84   | 30.30  | 0.024                                                                     | 0.054 | 0.122 |
| IDN     | Jakarta      | 0.053                   | 0.058 | 0.063 | 22.22                                                      | 91.57  | 313.86 | 0.024                                                                     | 0.054 | 0.122 |
| MYS     | Sungai Udang | 0.037                   | 0.040 | 0.044 | 4.78                                                       | 15.79  | 45.97  | 0.024                                                                     | 0.054 | 0.122 |
| MYS     | Johor        | 0.037                   | 0.040 | 0.044 | 1.79                                                       | 5.92   | 17.25  | 0.024                                                                     | 0.054 | 0.122 |
| PHL     | Batangas     | 0.087                   | 0.095 | 0.103 | 4.17                                                       | 20.47  | 81.26  | 0.024                                                                     | 0.054 | 0.122 |
| PHL     | Cebu         | 0.087                   | 0.095 | 0.103 | 2.58                                                       | 12.64  | 50.19  | 0.024                                                                     | 0.054 | 0.122 |
| PHL     | Davao        | 0.087                   | 0.095 | 0.103 | 1.64                                                       | 8.05   | 31.95  | 0.024                                                                     | 0.054 | 0.122 |
| THA     | Map Ta Phut  | 0.056                   | 0.062 | 0.067 | 11.24                                                      | 37.84  | 101.7  | 0.024                                                                     | 0.054 | 0.122 |
| SGP     | Singapore    | 0.103                   | 0.112 | 0.122 | 2.06                                                       | 5.45   | 13.48  | 0.024                                                                     | 0.054 | 0.122 |
| BRN     | Muara        | 0.031                   | 0.034 | 0.037 | 0.14                                                       | 0.38   | 1.00   | 0.024                                                                     | 0.054 | 0.122 |
| KHM     | Phnom-Penh   | 0.070                   | 0.077 | 0.084 | 0.55                                                       | 2.92   | 13.87  | 0.024                                                                     | 0.054 | 0.122 |
| MMR     | Yangon       | 0.026                   | 0.029 | 0.031 | 3.58                                                       | 19.66  | 76.14  | 0.024                                                                     | 0.054 | 0.122 |
| VNM     | Nha Trang    | 0.043                   | 0.047 | 0.051 | 10.83                                                      | 46.12  | 153.82 | 0.024                                                                     | 0.054 | 0.122 |



Note: Hourly demand is obtained from Toktarova *et al.*,<sup>8</sup> where the electricity demand of LAO is neglected since that LAO, as a landlocked country, has no offshore wind power resources available for grid connection.  $SNSP^{max}$  is set as 0.75.<sup>9,10</sup> Conversion ratios for electricity load used to consume offshore wind power are fetched from ratios of predicted offshore wind power to the total power generation based on International Energy Agency (IEA)<sup>11</sup> to calculate the electricity demand satisfied by offshore wind plants. The feed-in tariff is calculated as half of the grid electricity cost.<sup>12</sup> The grid electricity price is set to be increased by 5%, 15%, and 25% in 2030, 2040, and 2050,<sup>13</sup> respectively, compared with the current tariff, which is obtained from [www.cable.co.uk](http://www.cable.co.uk).<sup>14</sup>

**Table S3. Distance among harbours.**

| Distance among harbours (km) | AUS       | AUS     | AUS     | AUS      | AUS      | NZL      | NZL      | CHN      | CHN      | CHN      | CHN     | CHN     | CHN      | CHN      | CHN      | CHN      | KOR         | KOR      | JPN      | JPN      | JPN      | JPN      | JPN      | JPN      | IDN      | IDN       | IDN     | IDN      | MYS     | MYS     | PHL          | PHL     | PHL      | THA     | SGP     | BRN         | KHM       | MMR      | VNM        |          |           |
|------------------------------|-----------|---------|---------|----------|----------|----------|----------|----------|----------|----------|---------|---------|----------|----------|----------|----------|-------------|----------|----------|----------|----------|----------|----------|----------|----------|-----------|---------|----------|---------|---------|--------------|---------|----------|---------|---------|-------------|-----------|----------|------------|----------|-----------|
|                              | Gladstone | Darwin  | Onslow  | Kembla   | Adelaide | Auckland | Bluff    | Haikou   | Beihai   | Shenzhen | Xiamen  | Wenzhou | Shanghai | Yancheng | Qingdao  | Tianjin  | Qinhuangdao | Dalian   | Gunsan   | Donghae  | Otaru    | Kushiro  | Kanazawa | Hitachi  | Tobata   | Kagoshima | Tangguh | Makassar | Bontang | Jakarta | Sungai Udang | Johor   | Batangas | Cebu    | Davao   | Map Ta Phut | Singapore | Muara    | Phnom-Penh | Yangon   | Nha Trang |
| AUS Gladstone                | 0.00      | 3409.72 | 5556.00 | 1441.78  | 3704.00  | 2841.15  | 3093.40  | 7963.60  | 8547.91  | 7603.94  | 7277.99 | 7263.14 | 7408.00  | 7924.71  | 8409.75  | 8224.18  | 8499.38     | 8251.03  | 7734.32  | 8334.00  | 7900.63  | 8148.80  | 8101.20  | 7526.53  | 6111.60  | 6111.60   | 5556.00 | 6142.16  | 6852.40 | 7620.98 | 7592.83      | 6802.95 | 5411.54  | 5288.02 | 8611.80 | 7235.02     | 7963.60   | 8148.80  | 9074.80    | 8334.00  |           |
| AUS Darwin                   | 3409.72   | 0.00    | 2222.40 | 4630.00  | 6482.00  | 6310.50  | 6049.37  | 5185.60  | 5571.56  | 5209.49  | 5278.20 | 5370.80 | 5418.77  | 5741.20  | 6111.60  | 6318.65  | 6296.80     | 6420.70  | 6723.32  | 5556.00  | 7408.00  | 7037.60  | 6482.00  | 6137.53  | 5562.48  | 5419.32   | 1423.08 | 1983.68  | 2567.24 | 2592.80 | 3889.20      | 3564.17 | 3704.00  | 3391.57 | 2963.20 | 4772.05     | 3627.88   | 4074.40  | 4630.00    | 5370.80  | 4444.80   |
| AUS Onslow                   | 5556.00   | 2222.40 | 0.00    | 7408.00  | 3889.01  | 7455.23  | 6667.20  | 5444.69  | 6129.93  | 5389.51  | 5460.62 | 5823.43 | 6269.58  | 6608.49  | 6829.44  | 7348.18  | 7251.14     | 7049.64  | 6781.47  | 7045.75  | 8119.17  | 8061.02  | 7667.28  | 7298.55  | 6773.13  | 6465.52   | 3396.94 | 2037.20  | 2588.36 | 2407.60 | 3205.95      | 3704.00 | 4180.89  | 3909.76 | 3691.41 | 4630.00     | 3374.90   | 4074.40  | 4259.60    | 5071.33  | 4630.00   |
| AUS Kembla                   | 1441.78   | 4630.00 | 7408.00 | 0.00     | 1852.00  | 2422.05  | 2049.42  | 8778.48  | 8900.53  | 8408.45  | 8330.85 | 8458.27 | 8668.47  | 8889.60  | 9019.05  | 9528.73  | 9499.28     | 9182.22  | 8871.45  | 8871.45  | 10186.00 | 8889.60  | 9501.13  | 8220.10  | 8290.48  | 8146.95   | 7222.80 | 6667.20  | 7253.36 | 7963.60 | 8732.18      | 8704.03 | 7586.35  | 4300.34 | 4176.26 | 9179.25     | 8236.21   | 6852.40  | 7037.60    | 9905.05  | 7222.80   |
| AUS Adelaide                 | 3704.00   | 6482.00 | 3889.01 | 1852.00  | 0.00     | 3813.27  | 3092.28  | 9143.51  | 9445.20  | 8889.60  | 9149.81 | 9514.65 | 10144.89 | 10278.60 | 10808.83 | 10964.03 | 11043.85    | 10999.58 | 10472.32 | 10736.97 | 11259.60 | 10880.69 | 11297.20 | 10268.41 | 10436.58 | 9979.13   | 7131.68 | 5721.38  | 6279.58 | 5556.00 | 7222.80      | 6936.67 | 7868.04  | 7600.61 | 7382.44 | 8148.80     | 6849.25   | 7778.40  | 7963.60    | 8441.23  | 8334.00   |
| NZL Auckland                 | 2841.15   | 6310.50 | 7455.23 | 2422.05  | 3813.27  | 0.00     | 1789.59  | 9850.42  | 11205.16 | 9710.96  | 9315.37 | 9389.08 | 9553.73  | 9630.40  | 10047.47 | 10485.65 | 10331.38    | 10136.18 | 9915.42  | 9644.85  | 9863.75  | 9609.84  | 10000.80 | 9047.76  | 9074.80  | 8704.40   | 7380.22 | 7593.20  | 8193.80 | 8889.60 | 8982.20      | 8926.64 | 8639.77  | 8053.05 | 7447.08 | 10680.48    | 9384.82   | 10000.80 | 10371.20   | 11575.56 | 10556.40  |
| NZL Bluff                    | 3093.40   | 6049.37 | 6667.20 | 2049.42  | 3092.28  | 1789.59  | 0.00     | 10741.60 | 12038.00 | 9710.96  | 9315.37 | 9389.08 | 10596.77 | 10556.40 | 10973.47 | 11411.65 | 11257.38    | 11062.18 | 10841.42 | 10570.85 | 10789.75 | 10535.84 | 10926.80 | 9973.76  | 10000.80 | 9689.48   | 8306.22 | 8519.20  | 9119.80 | 9815.60 | 9908.20      | 9852.64 | 9565.77  | 8979.05 | 8373.08 | 11606.48    | 10078.77  | 10926.80 | 11297.20   | 12501.56 | 11482.40  |
| CHN Haikou                   | 7963.60   | 5185.60 | 5444.69 | 8778.48  | 9143.51  | 9850.42  | 10741.60 | 0.00     | 220.20   | 505.78   | 994.34  | 1522.71 | 1991.27  | 2037.20  | 2520.57  | 3081.17  | 2963.20     | 2843.38  | 2598.54  | 2937.27  | 4028.10  | 4220.34  | 3518.80  | 3653.81  | 2682.07  | 2503.90   | 4082.18 | 3751.23  | 3078.21 | 3296.56 | 2771.89      | 3092.84 | 1440.12  | 2173.32 | 2854.12 | 2407.60     | 2518.53   | 2222.40  | 1814.96    | 4570.92  | 1074.16   |
| CHN Beihai                   | 8547.91   | 5571.56 | 6129.93 | 8900.53  | 9445.20  | 11205.16 | 12038.00 | 220.20   | 0.00     | 735.98   | 1255.47 | 1743.29 | 2244.62  | 2705.03  | 2790.41  | 3134.14  | 2999.87     | 3208.40  | 2818.93  | 3157.66  | 4748.71  | 4578.14  | 3909.76  | 4189.04  | 2935.23  | 2779.67   | 5156.89 | 3877.16  | 3204.15 | 3333.60 | 2816.52      | 3137.47 | 1554.94  | 2407.41 | 2968.94 | 1551.42     | 2552.06   | 2160.73  | 1852.00    | 5299.68  | 1111.20   |
| CHN Shenzhen                 | 7603.94   | 5209.49 | 5389.51 | 8408.45  | 8889.60  | 9710.96  | 9710.96  | 505.78   | 735.98   | 0.00     | 500.60  | 1041.19 | 1507.53  | 1872.00  | 2057.94  | 2660.95  | 2590.02     | 2386.96  | 2304.44  | 2733.74  | 3850.86  | 4076.44  | 3083.21  | 3676.03  | 2504.46  | 2451.12   | 4018.10 | 3710.48  | 3037.47 | 3159.14 | 2945.98      | 3153.77 | 1314.92  | 2167.40 | 2728.92 | 2685.40     | 2734.29   | 2291.85  | 2037.20    | 5315.98  | 1296.40   |
| CHN Xiamen                   | 7277.99   | 5278.20 | 5460.62 | 8330.85  | 9149.81  | 9315.37  | 9315.37  | 994.34   | 1255.47  | 500.60   | 0.00    | 615.05  | 1074.35  | 1449.56  | 1639.02  | 2187.95  | 2089.98     | 1892.00  | 1691.25  | 2023.68  | 3102.10  | 3363.42  | 2458.34  | 2714.48  | 1766.44  | 1536.23   | 3963.28 | 3632.33  | 2959.31 | 3984.95 | 3342.49      | 3047.84 | 1387.52  | 2185.73 | 2453.34 | 3190.81     | 3106.36   | 2300.37  | 2503.35    | 5129.30  | 1762.55   |
| CHN Wenzhou                  | 7263.17   | 5370.80 | 5823.43 | 8458.27  | 9514.65  | 9389.08  | 9389.08  | 1522.71  | 1743.29  | 1041.19  | 615.05  | 0.00    | 602.64   | 872.85   | 1071.57  | 1648.28  | 1558.83     | 1399.19  | 1399.56  | 1321.22  | 2645.95  | 2806.34  | 2178.32  | 2275.74  | 1270.66  | 1088.61   | 4206.82 | 3980.13  | 3307.12 | 4588.89 | 3881.61      | 3732.71 | 1792.00  | 2548.17 | 2730.59 | 3704.00     | 3658.81   | 2778.00  | 3107.29    | 5719.16  | 2366.49   |
| CHN Shanghai                 | 7326.14   | 5418.77 | 6269.58 | 8668.47  | 10144.89 | 9553.73  | 10596.77 | 1991.27  | 2244.62  | 1507.53  | 1074.35 | 602.64  | 0.00     | 294.28   | 731.91   | 1303.62  | 1228.99     | 1024.71  | 796.92   | 1250.47  | 2343.34  | 2568.91  | 1575.68  | 2168.51  | 996.93   | 943.59    | 4482.21 | 4581.85  | 3837.16 | 4645.37 | 4416.28      | 4279.60 | 2257.03  | 2822.82 | 3132.84 | 4253.86     | 4129.77   | 3218.96  | 3474.17    | 6119.93  | 2733.37   |
| CHN Yancheng                 | 7408.00   | 5741.20 | 6608.49 | 8889.60  | 10278.60 | 9630.40  | 10556.40 | 2037.20  | 2705.03  | 1872.00  | 1449.56 | 872.85  | 294.28   | 0.00     | 225.39   | 923.96   | 853.59      | 741.73   | 648.20   | 1273.25  | 2592.80  | 2778.00  | 1666.80  | 2407.60  | 1111.20  | 1111.20   | 4808.72 | 4908.36  | 4163.67 | 4971.88 | 4742.79      | 4606.11 | 2583.54  | 3310.26 | 3437.50 | 4580.37     | 4456.28   | 3545.47  | 3800.67    | 6446.44  | 3059.87   |
| CHN Qingdao                  | 7924.71   | 6111.60 | 6829.44 | 9019.05  | 10808.83 | 10047.47 | 10973.47 | 2520.57  | 2790.41  | 2057.94  | 1639.02 | 1071.57 | 731.91   | 225.39   | 0.00     | 632.46   | 528.56      | 507.63   | 584.12   | 1178.80  | 2437.97  | 2575.39  | 1610.87  | 2371.12  | 1116.20  | 1185.65   | 5000.40 | 4815.20  | 4364.79 | 5278.20 | 5497.29      | 4825.39 | 2903.01  | 3379.16 | 4038.84 | 4815.20     | 4620.18   | 3965.32  | 4074.40    | 6667.20  | 3333.60   |
| CHN Tianjin                  | 8409.75   | 6318.65 | 7348.18 | 9528.73  | 10964.03 | 10485.65 | 11411.65 | 3081.17  | 3134.14  | 2660.95  | 2187.95 | 1648.28 | 1303.62  | 923.96   | 632.46   | 0.00     | 147.42      | 404.85   | 876.37   | 1667.17  | 2808.74  | 3024.50  | 2102.76  | 2724.66  | 1469.38  | 1622.54   | 5686.94 | 5463.40  | 5027.62 | 5926.40 | 5448.77      | 5326.54 | 3329.71  | 3714.37 | 4192.19 | 5370.80     | 5240.05   | 4348.68  | 4630.00    | 7271.51  | 3796.60   |
| CHN Qinhuangdao              | 8224.18   | 6296.80 | 7251.14 | 9499.28  | 11043.85 | 10331.38 | 11257.38 | 2963.20  | 2999.87  | 2590.02  | 2089.98 | 1558.83 | 1228.99  | 853.59   | 528.56   | 147.42   | 0.00        | 303.91   | 784.32   | 1559.57  | 2710.96  | 2898.01  | 1944.60  | 2587.80  | 1358.44  | 1533.83   | 5498.96 | 5278.20  | 4853.54 | 5741.20 | 5355.61      | 5065.78 | 3238.78  | 3750.49 | 4046.62 | 5278.20     | 5128.93   | 4167.56  | 4537.40    | 7176.31  | 3704.00   |
| CHN Dalian                   | 8499.38   | 6420.70 | 7049.64 | 9182.22  | 10999.58 | 10136.18 | 11062.18 | 2843.38  | 3208.40  | 2386.86  | 1892.00 | 1399.19 | 1024.71  | 741.73   | 507.63   | 404.85   | 303.91      | 0.00     | 561.71   | 1374.74  | 2541.13  | 2713.74  | 1827.00  | 2437.05  | 1136.02  | 1319.36   | 5351.17 | 5093.00  | 4710.56 | 5648.60 | 5215.60      | 5424.32 | 3078.39  | 3520.47 | 3899.94 | 5197.64     | 4989.66   | 3999.39  | 4352.20    | 6934.44  | 3518.80   |
| KOR Gunsan                   | 8251.03   | 6723.32 | 6781.47 | 8871.45  | 10472.32 | 9915.42  | 10841.42 | 2598.54  | 2818.93  | 2304.44  | 1691.25 | 1399.56 | 796.92   | 648.20   | 584.12   | 876.37   | 784.32      | 561.71   | 0.00     | 894.70   | 2121.28  | 2291.66  | 1389.00  | 1997.94  | 758.58   | 940.26    | 4949.28 | 4815.20  | 4414.80 | 5370.80 | 4883.72      | 4832.24 | 2773.18  | 3353.05 | 3543.62 | 4907.80     | 4632.96   | 3796.60  | 4167.00    | 6704.43  | 3426.20   |
| KOR Donghae                  | 7734.32   | 5556.00 | 7045.75 | 8871.45  | 10736.97 | 9644.85  | 10570.85 | 2937.27  | 3157.66  | 2733.74  | 2023.68 | 1321.22 | 1250.47  | 1273.25  | 1178.80  | 1667.17  | 1559.57     | 1374.74  | 894.70   | 0.00     | 1242.32  | 1476.97  | 710.24   | 1696.43  | 451.70   | 955.82    | 5072.44 | 5185.60  | 4678.71 | 5741.20 | 5210.97      | 4926.51 | 3014.50  | 3351.56 | 3710.48 | 5278.20     | 4970.03   | 4167.00  | 4630.00    | 7031.49  | 3796.60   |
| JPN Otaru                    | 8334.00   | 7408.00 | 8119.17 | 10186.00 | 11259.60 | 9863.75  | 10789.75 | 4028.10  | 4748.71  | 3850.86  | 3102.10 | 2645.95 | 2343.34  | 2592.80  | 2437.97  | 2808.74  | 2710.96     | 2541.13  | 2121.28  | 1242.32  | 0.00     | 770.06   | 1071.94  | 1056.57  | 1452.52  | 2010.72   | 6057.15 | 6296.80  | 5752.50 | 6759.80 | 6298.28      | 6111.60 | 4087.73  | 4600.37 | 4778.90 | 6389.40     | 6068.08   | 5098.74  | 5648.60    | 8118.98  | 4691.67   |
| JPN Kushiro                  | 7900.63   | 7037.60 | 8061.02 | 8889.60  | 10880.69 | 9609.84  | 10535.84 | 4220.34  | 4578.14  | 4076.44  | 3363.42 | 2806.34 | 2568.91  | 2778.00  | 2575.39  | 3024.50  | 2898.01     | 2713.74  | 2291.66  | 1476.97  | 770.06   | 0.00     | 1121.57  | 802.66   | 1636.98  | 2083.31   | 5765.09 | 6389.40  | 5694.53 | 7408.00 | 6490.89      | 6948.70 | 4279.97  | 4500.55 | 4612.22 | 6574.60     | 6249.94   | 5291.16  | 5741.20    | 8311.41  | 5000.40   |
| JPN Kanazawa                 | 8148.80   | 6482.00 | 7667.28 | 9501.13  | 11297.20 | 10000.80 | 10926.80 | 3518.80  | 3909.76  | 3083.21  | 2458.34 | 2178.32 | 1575.68  | 1666.80  | 1610.87  | 2102.76  | 1944.60     | 1827.00  | 1389.00  | 710.24   | 1071.94  | 1121.57  | 0.00     | 1481.60  | 674.31   | 1183.61   | 5741.20 | 5556.00  | 5000.40 | 6111.60 | 5648.60      | 5370.80 | 3518.80  | 3611.40 | 4074.40 | 5556.00     | 5298.76   | 4444.80  | 5000.40    | 7408.00  | 4167.00   |
| JPN Hitachi                  | 8101.20   | 6137.53 | 7298.55 | 8220.10  | 10268.41 | 9047.7   |          |          |          |          |         |         |          |          |          |          |             |          |          |          |          |          |          |          |          |           |         |          |         |         |              |         |          |         |         |             |           |          |            |          |           |

|     |             |         |         |         |         |         |          |          |         |         |         |         |         |         |         |         |         |         |         |         |         |         |         |         |         |         |         |         |         |         |         |         |         |         |         |         |         |         |         |         |         |         |
|-----|-------------|---------|---------|---------|---------|---------|----------|----------|---------|---------|---------|---------|---------|---------|---------|---------|---------|---------|---------|---------|---------|---------|---------|---------|---------|---------|---------|---------|---------|---------|---------|---------|---------|---------|---------|---------|---------|---------|---------|---------|---------|---------|
| MYS | Johor       | 7592.83 | 3564.17 | 370.40  | 8704.03 | 6936.67 | 8926.64  | 9852.64  | 3092.84 | 3137.47 | 3153.77 | 3047.84 | 3732.71 | 4279.60 | 4606.11 | 4825.39 | 5326.54 | 5065.78 | 5424.32 | 4832.24 | 4926.51 | 6111.60 | 6948.70 | 5370.80 | 5648.60 | 4784.83 | 4475.17 | 3796.60 | 1981.27 | 2240.92 | 1111.20 | 320.95  | 0.00    | 2422.23 | 3119.69 | 3169.14 | 1441.41 | 42.41   | 1419.37 | 1444.56 | 2162.21 | 1481.60 |
| PHL | Batangas    | 6802.95 | 3704.00 | 4180.89 | 7586.35 | 7868.04 | 8639.77  | 9565.77  | 1440.12 | 1554.94 | 1314.92 | 1387.52 | 1792.00 | 2257.03 | 2583.54 | 2903.01 | 3329.71 | 3238.78 | 3078.39 | 2773.18 | 3014.50 | 4087.73 | 4279.97 | 3518.80 | 3571.77 | 2741.70 | 2500.94 | 2665.21 | 2243.51 | 1810.52 | 2963.20 | 2749.66 | 2422.23 | 0.00    | 852.48  | 1414.00 | 2603.54 | 2470.01 | 1256.40 | 2037.20 | 4571.66 | 1296.40 |
| PHL | Cebu        | 5411.54 | 3391.57 | 3909.76 | 4300.34 | 7600.61 | 8053.05  | 8979.05  | 2173.32 | 2407.41 | 2167.40 | 2185.73 | 2548.17 | 2822.82 | 3310.26 | 3379.16 | 3714.37 | 3750.49 | 3520.47 | 3353.05 | 3351.56 | 4600.37 | 4500.55 | 3611.40 | 3738.08 | 3206.74 | 2852.27 | 2463.72 | 2024.05 | 1543.09 | 3148.40 | 2836.15 | 3119.69 | 852.48  | 0.00    | 1048.23 | 3278.04 | 2532.98 | 1298.99 | 2407.60 | 4650.00 | 1944.60 |
| PHL | Davao       | 5288.02 | 2963.20 | 3691.41 | 4176.26 | 7382.44 | 7447.08  | 8373.08  | 2854.12 | 2968.94 | 2728.92 | 2453.34 | 2730.59 | 3132.84 | 3437.50 | 4038.84 | 4192.19 | 4046.62 | 3899.94 | 3543.62 | 3710.48 | 4778.90 | 4612.22 | 4074.40 | 3849.94 | 3368.42 | 3016.72 | 1691.25 | 1762.55 | 1274.55 | 2963.20 | 3213.03 | 3169.14 | 1414.00 | 1048.23 | 0.00    | 3253.22 | 2864.12 | 1635.13 | 2778.00 | 5033.55 | 2315.00 |
| THA | Map Ta Phut | 8611.80 | 4772.05 | 4630.00 | 9179.25 | 8148.80 | 10680.48 | 11606.48 | 2407.60 | 1551.42 | 2685.40 | 3190.81 | 3704.00 | 4253.86 | 4580.37 | 4815.20 | 5370.80 | 5278.20 | 5197.64 | 4907.80 | 5278.20 | 6389.40 | 6574.60 | 5556.00 | 5833.80 | 5000.40 | 4689.63 | 4901.50 | 3493.98 | 3368.79 | 2222.40 | 1668.84 | 1441.41 | 2603.54 | 3278.04 | 3253.22 | 0.00    | 1429.00 | 2040.35 | 1296.40 | 3611.40 | 1481.60 |
| SGP | Singapore   | 7235.02 | 3627.88 | 3374.90 | 8236.21 | 6849.25 | 9384.82  | 10078.77 | 2518.53 | 2552.06 | 2734.29 | 3106.36 | 3658.81 | 4129.77 | 4456.28 | 4620.18 | 5240.05 | 5128.93 | 4989.66 | 4632.96 | 4970.03 | 6068.08 | 6249.94 | 5298.76 | 5607.49 | 4741.49 | 4465.73 | 3880.50 | 2078.68 | 2470.94 | 1296.40 | 320.40  | 42.41   | 2470.01 | 2532.98 | 2864.12 | 1429.00 | 0.00    | 1386.78 | 1481.60 | 2054.05 | 1456.60 |
| BRN | Muara       | 7963.60 | 4074.40 | 4074.40 | 6852.40 | 7778.40 | 10000.80 | 10926.80 | 2222.40 | 2160.73 | 2291.85 | 2300.37 | 2778.00 | 3218.96 | 3545.47 | 3965.32 | 4348.68 | 4167.56 | 3999.39 | 3796.60 | 4167.00 | 5098.74 | 5291.16 | 4444.80 | 4722.60 | 3752.15 | 3504.72 | 3007.46 | 2315.00 | 1759.40 | 1852.00 | 1697.73 | 1419.37 | 1256.40 | 1298.99 | 1635.13 | 2040.35 | 1386.78 | 0.00    | 1481.60 | 3518.80 | 1111.20 |
| KHM | Phnom-Penh  | 8148.80 | 4630.00 | 4259.60 | 7037.60 | 7963.60 | 10371.20 | 11297.20 | 1814.96 | 1852.00 | 2037.20 | 2503.35 | 3107.29 | 3474.17 | 3800.67 | 4074.40 | 4630.00 | 4537.40 | 4352.20 | 4167.00 | 4630.00 | 5648.60 | 5741.20 | 5000.40 | 5093.00 | 4259.60 | 3889.20 | 4074.40 | 3055.80 | 2963.20 | 2222.40 | 1666.80 | 1444.56 | 2037.20 | 2407.60 | 2778.00 | 1296.40 | 1481.60 | 1481.60 | 0.00    | 3518.80 | 740.80  |
| MMR | Yangon      | 9074.80 | 5370.80 | 5071.33 | 9905.05 | 8441.23 | 11575.56 | 12501.56 | 4570.92 | 5299.68 | 5315.98 | 5129.30 | 5719.16 | 6119.93 | 6446.44 | 6667.20 | 7271.51 | 7176.31 | 6934.44 | 6704.43 | 7031.49 | 8118.98 | 8311.41 | 7408.00 | 7615.05 | 6773.13 | 6517.19 | 5931.40 | 4299.42 | 4371.46 | 3148.40 | 1837.37 | 2162.21 | 4571.66 | 4650.00 | 5033.55 | 3611.40 | 2054.05 | 3518.80 | 3518.80 | 0.00    | 3518.80 |
| VNM | Nha Trang   | 8334.00 | 4444.80 | 4630.00 | 7222.80 | 8334.00 | 10556.40 | 11482.40 | 1074.16 | 1111.20 | 1296.40 | 1762.55 | 2366.49 | 2733.37 | 3059.87 | 3333.60 | 3796.60 | 3704.00 | 3518.80 | 3426.20 | 3796.60 | 4691.67 | 5000.40 | 4167.00 | 4352.20 | 3426.20 | 3140.07 | 3611.40 | 2778.00 | 2315.00 | 2222.40 | 1705.32 | 1481.60 | 1296.40 | 1944.60 | 2315.00 | 1481.60 | 1456.60 | 1111.20 | 740.80  | 3518.80 | 0.00    |

**Table S4. Hydrogen demand prediction in RCEP in 2050.**

|     | Power generation (Mt) | Building heat (Mt) | Industry heat (Mt) | Transportation (Mt) | Industry (Mt) | Total demand (Mt) |
|-----|-----------------------|--------------------|--------------------|---------------------|---------------|-------------------|
| CHN | 41.92                 | 2.45               | 6.78               | 57.54               | 13.30         | 122.00            |
| JPN | 4.38                  | 0.02               | 0.00               | 7.41                | 1.33          | 13.15             |
| KOR | 3.19                  | 0.09               | 0.42               | 5.93                | 0.57          | 10.19             |
| AUS | 1.47                  | 0.00               | 0.00               | 4.69                | 0.61          | 6.77              |
| NZL | 0.26                  | 0.00               | 0.00               | 0.80                | 0.08          | 1.13              |
| IDN | 4.62                  | 0.00               | 0.00               | 10.70               | 3.18          | 18.51             |
| MYS | 1.20                  | 0.00               | 0.00               | 5.27                | 0.33          | 6.80              |
| PHL | 1.17                  | 0.00               | 0.00               | 2.58                | 0.16          | 3.91              |
| SGP | 0.30                  | 0.00               | 0.00               | 0.24                | 0.09          | 0.63              |
| THA | 2.19                  | 0.00               | 0.00               | 5.04                | 0.60          | 7.83              |
| VNM | 1.77                  | 0.00               | 0.00               | 5.58                | 0.55          | 7.90              |
| BRN | 0.02                  | 0.00               | 0.00               | 0.07                | 0.00          | 0.10              |
| KHM | 0.17                  | 0.00               | 0.00               | 0.52                | 0.05          | 0.74              |
| LAO | 0.13                  | 0.00               | 0.00               | 0.39                | 0.04          | 0.56              |
| MMR | 0.33                  | 0.00               | 0.00               | 0.77                | 0.09          | 1.19              |

**Table S5. Techno-economic data for offshore wind turbine and water electrolyser.**

|                                                     | Offshore wind turbine |      |      | Water electrolyser-hydrogen (PEMEC <sup>c</sup> ) |       |       | Water electrolyser-MCH | Water electrolyser-ammonia |
|-----------------------------------------------------|-----------------------|------|------|---------------------------------------------------|-------|-------|------------------------|----------------------------|
|                                                     | 2030                  | 2040 | 2050 | 2030                                              | 2040  | 2050  | 2050                   | 2050                       |
| Investment cost (\$/kW)                             | 2500                  | 1900 | 1300 | 700                                               | 575   | 450   | 1100                   | 750                        |
| Electrical efficiency (% LHV <sup>a</sup> )         | —                     | —    | —    | 69                                                | 71.5  | 74    | 63                     | 64                         |
| Annual O&M <sup>b</sup> cost (% of investment cost) | 2                     | 2    | 2    | 1.5                                               | 1.5   | 1.5   | 1.5                    | 1.5                        |
| Water demand (m <sup>3</sup> /kgH <sub>2</sub> )    | —                     | —    | —    | 0.015                                             | 0.015 | 0.015 | 0.015                  | 0.015                      |
| Water tariff (\$/m <sup>3</sup> )                   | —                     | —    | —    | 4.8                                               | 4.8   | 4.8   | 4.8                    | 4.8                        |
| System lifetime (year)                              | 20                    | 20   | 20   | 20                                                | 20    | 20    | 20                     | 20                         |
| Reference                                           | 11, 15-17             |      |      | 2,7,17,18                                         |       |       | 17,19,20               | 17,20,21                   |

<sup>a</sup> LHV = lower heating value, 33.3 kWh/kg for hydrogen, 12.1 kWh/kg for MCH, 5.2 kWh/kg for ammonia.

<sup>b</sup> O&M = operation and maintenance.

<sup>c</sup> PEMEC = proton exchange membrane electrolyser cell.

**Table S6. Techno-economic data for hydrogen conversion.**

|                                                     | Compression |       |      | Liquefaction |      |      | MCH cracking | Ammonia cracking |
|-----------------------------------------------------|-------------|-------|------|--------------|------|------|--------------|------------------|
|                                                     | 2030        | 2040  | 2050 | 2030         | 2040 | 2050 | 2050         | 2050             |
| Investment cost (k\$/kgH <sub>2</sub> )             | 0.41        | 0.385 | 0.36 | 25           | 21.5 | 18   | 0.7          | 0.9              |
| Loss (%)                                            | 0.5         | 0.5   | 0.5  | 1.65         | 1.65 | 1.65 | 2            | 2                |
| Annual O&M <sup>a</sup> cost (% of investment cost) | 2           | 2     | 2    | 4            | 4    | 4    | 4            | 4                |
| Electricity demand (kWh/kgH <sub>2</sub> )          | 0.84        | 0.84  | 0.84 | 6.76         | 6.38 | 6    | 1.52         | 1.51             |
| System lifetime (year)                              | 15          | 15    | 15   | 20           | 20   | 20   | 20           | 20               |
| Reference                                           | 17,18       |       |      | 17,18,20     |      |      | 17           | 17               |

<sup>a</sup> O&M = operation and maintenance.

**Table S7. Techno-economic data for storage and transportation.**

|                                                                                      | Liquid H <sub>2</sub> storage (IM <sup>b</sup> /EX <sup>c</sup> ) |                       |                       | MCH storage (IM/EX) | Ammonia storage (IM/EX) | Liquid H <sub>2</sub> ship |                       |                       | MCH ship | Ammonia ship |
|--------------------------------------------------------------------------------------|-------------------------------------------------------------------|-----------------------|-----------------------|---------------------|-------------------------|----------------------------|-----------------------|-----------------------|----------|--------------|
|                                                                                      | 2030                                                              | 2040                  | 2050                  | 2050                | 2050                    | 2030                       | 2040                  | 2050                  | 2050     | 2050         |
| Investment cost (\$/kgH <sub>2</sub> , \$/kgCH <sub>4</sub> , \$/kgNH <sub>3</sub> ) | 26                                                                | 22                    | 18                    | 0.81                | 2.0                     | —                          | —                     | —                     | —        | —            |
| Investment cost (M\$/ship)                                                           | —                                                                 | —                     | —                     | —                   | —                       | 398                        | 305.5                 | 213                   | 76       | 85           |
| Unit capacity (ktH <sub>2</sub> , ktCH <sub>4</sub> , ktNH <sub>3</sub> )            | —                                                                 | —                     | —                     | —                   | —                       | 11                         | 11                    | 11                    | 110      | 53           |
| Loss (%)                                                                             | 0.1 day <sup>-1</sup>                                             | 0.1 day <sup>-1</sup> | 0.1 day <sup>-1</sup> | 0                   | 0                       | 0.2 day <sup>-1</sup>      | 0.2 day <sup>-1</sup> | 0.2 day <sup>-1</sup> | 0        | 0            |
| Annual O&M <sup>a</sup> cost (% of investment cost)                                  | 2                                                                 | 2                     | 2                     | 2                   | 4                       | 4                          | 4                     | 4                     | 4        | 4            |
| Fuel consumption (ton/day)                                                           | —                                                                 | —                     | —                     | —                   | —                       | 45                         | 45                    | 45                    | 80       | 50           |
| Fuel tariff (\$/ton)                                                                 | —                                                                 | —                     | —                     | —                   | —                       | 480                        | 480                   | 480                   | 480      | 480          |
| System lifetime (year)                                                               | 20                                                                | 20                    | 20                    | 20                  | 20                      | 25                         | 25                    | 25                    | 25       | 25           |
| Average speed (km/h)                                                                 | —                                                                 | —                     | —                     | —                   | —                       | 30                         | 30                    | 30                    | 30       | 30           |
| Load/unload time (hour)                                                              | —                                                                 | —                     | —                     | —                   | —                       | 48                         | 48                    | 48                    | 48       | 48           |
| Reference                                                                            | 17,20                                                             |                       |                       | 17,20               | 17,20                   | 17,18,20                   |                       |                       | 17,20    | 17,20        |

<sup>a</sup> O&M = operation and maintenance.

<sup>b</sup> IM = import.

<sup>c</sup> EX = export.

## Notes and references

- 1 Hydrogen Council, Hydrogen scaling up, [https://hydrogencouncil.com/wp-content/uploads/2017/11/Hydrogen-Scaling-up\\_Hydrogen-Council\\_2017.compressed.pdf](https://hydrogencouncil.com/wp-content/uploads/2017/11/Hydrogen-Scaling-up_Hydrogen-Council_2017.compressed.pdf), (accessed 5 July 2022).
- 2 Asia Pacific Energy Research Centre (APERC), Perspectives on hydrogen in the APEC region, <https://aperc.or.jp/file/2018/9/12/Perspectives+on+Hydrogen+in+the+APEC+Region.pdf>, (accessed 5 July 2022).
- 3 Asia Pacific Energy Research Centre (APERC), APEC energy demand and supply outlook 7th edition volume I, [https://aperc.or.jp/file/2019/5/30/APEC\\_Energy\\_Outlook\\_7th\\_Edition\\_Vol\\_I.pdf](https://aperc.or.jp/file/2019/5/30/APEC_Energy_Outlook_7th_Edition_Vol_I.pdf), (accessed 5 July 2022).
- 4 Asia Pacific Energy Research Centre (APERC), APEC energy demand and supply outlook 7th edition volume II, [https://aperc.or.jp/file/2019/5/30/APEC\\_Energy\\_Outlook\\_7th\\_Edition\\_Vol\\_II.pdf](https://aperc.or.jp/file/2019/5/30/APEC_Energy_Outlook_7th_Edition_Vol_II.pdf), (accessed 5 July 2022).
- 5 Hydrogen Council, Hydrogen for net zero, <https://hydrogencouncil.com/en/hydrogen-for-net-zero/>, (accessed 5 November 2022).
- 6 International Energy Agency (IEA), Global hydrogen review 2022, <https://www.iea.org/reports/global-hydrogen-review-2022>, (accessed 5 November 2022).
- 7 International Energy Agency (IEA), The future of hydrogen, <https://www.iea.org/reports/the-future-of-hydrogen>, (accessed 5 July 2022).
- 8 A. Toktarova, L. Gruber, M. Hlusiak, D. Bogdanov and C. Breyer, Long term load projection in high resolution for all countries globally, *International Journal of Electrical Power & Energy Systems*, 2019, **111**, 160-181.
- 9 E. V. Mc Garrigle, J. P. Deane and P. G. Leahy, How much wind energy will be curtailed on the 2020 Irish power system? *Renew. Energ.*, 2013, **55**, 544-553.
- 10 S. McDonagh, S. Ahmed, C. Desmond and J. D. Murphy, Hydrogen from offshore wind: Investor perspective on the profitability of a hybrid system including for curtailment, *Appl. Energ.*, 2020, **265**, 114732.
- 11 International Energy Agency (IEA), Offshore wind outlook 2019, <https://www.iea.org/reports/offshore-wind-outlook-2019>, (accessed 2 February 2023).
- 12 T. Terlouw, C. Bauer, R. McKenna and M. Mazzotti, Large-scale hydrogen production via water electrolysis: a techno-economic and environmental assessment, *Energ. Environ. Sci.*, 2022, **15**, 3583-3602.
- 13 Wood Mackenzie, Asia Pacific power & renewables 2021 outlook to 2050, <https://www.woodmac.com/industry/power-and-renewables/asia-pacific-power--renewables-service/>, (accessed 14 February 2023).
- 14 Cable.co.uk, The price of electricity per KWh in 230 countries, <https://www.cable.co.uk/energy/worldwide-pricing/>, (accessed 14 February 2023).
- 15 International Renewable Energy Agency (IRENA), Future of wind: Deployment, investment, technology, grid integration and socio-economic aspects, <https://www.irena.org/publications/2019/Oct/Future-of-wind>, (accessed 5 July 2022).
- 16 P. Sherman, X. Chen and M. McElroy, Offshore wind: An opportunity for cost-competitive decarbonization of China's energy economy, *Science Advances*, 2020, **6**, x9571.
- 17 S. Song, H. Lin, P. Sherman, X. Yang, C. P. Nielsen, X. Chen and M. B. McElroy, Production of hydrogen from offshore wind in China and cost-competitive supply to Japan, *Nat. Commun.*, 2021, **12**, 6953.
- 18 P. Heuser, D. S. Ryberg, T. Grube, M. Robinius and D. Stolten, Techno-economic analysis of a potential energy trading link between Patagonia and Japan based on CO2 free hydrogen, *Int. J. Hydrogen Energ.*, 2019, **44**, 12733-12747.
- 19 A. T. Wijayanta, T. Oda, C. W. Purnomo, T. Kashiwagi and M. Aziz, Liquid hydrogen, methylcyclohexane, and ammonia as potential hydrogen storage: Comparison review, *Int. J. Hydrogen Energ.*, 2019, **44**, 15026-15044.



- 20 International Energy Agency (IEA), IEA G20 Hydrogen report: Assumptions, <https://iea.blob.core.windows.net/assets/a02a0c80-77b2-462e-a9d5-1099e0e572ce/IEA-The-Future-of-Hydrogen-Assumptions-Annex.pdf>, (accessed 5 July 2022).
- 21 International Energy Agency (IEA), Ammonia technology roadmap, <https://www.iea.org/reports/ammonia-technology-roadmap>, (accessed 13 November 2022).
